# Supplementary material for: Single-cell transcriptomes of pancreatic preinvasive lesions and cancer reveal acinar metaplastic cells’ heterogeneity
Source: PubMed Central journal article supplement (PMC7481797; doi:10.1038/s41467-020-18207-z), 2020-09-09

## **Single cell transcriptomes of pancreatic pre-invasive lesions and cancer reveal acinar metaplastic cells' heterogeneity**

The data source file includes additional microscopy images from different mice and human patients and raw data of lesion counts that are shown in Supplementary Figure 1A. In the last part, we show the gating strategy for the tomato sorted cells.

Additional represented photos for Figure 1A

Mouse 1

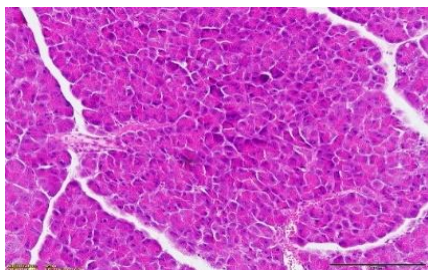

Mouse 2

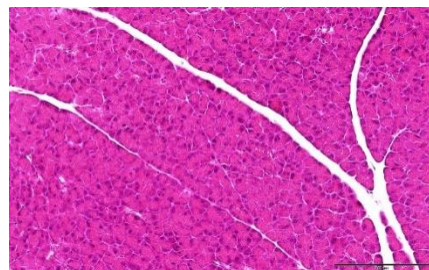

Mouse 3

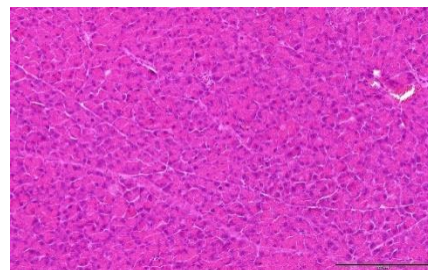

Mouse 4

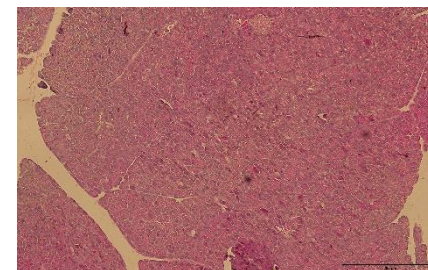

Mouse 4

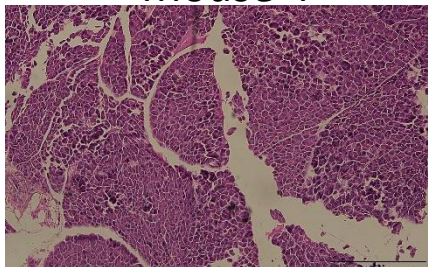

Mouse 5

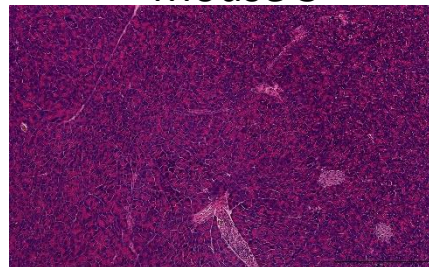

Mouse 6

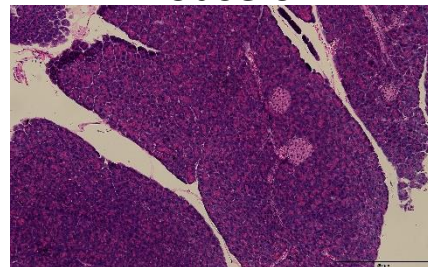

Mouse 7

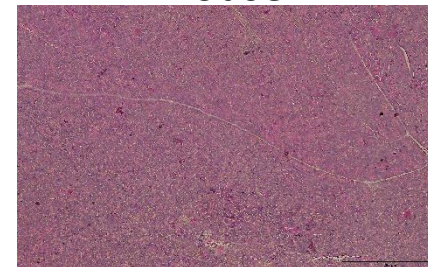

Additional represented photos for Figure 1B

Mouse 1

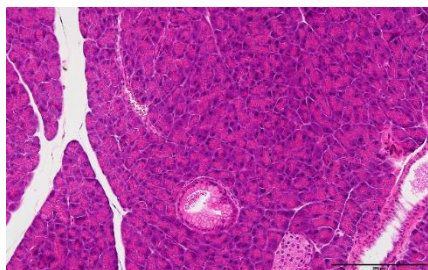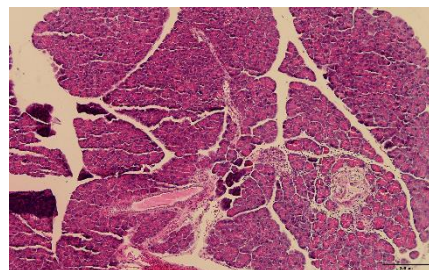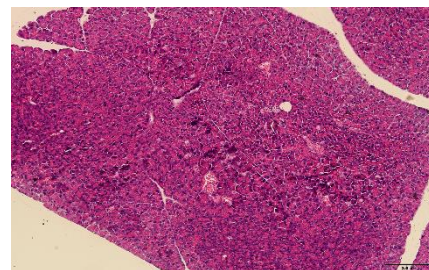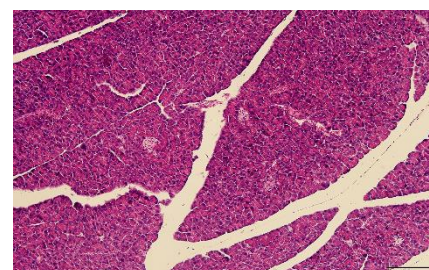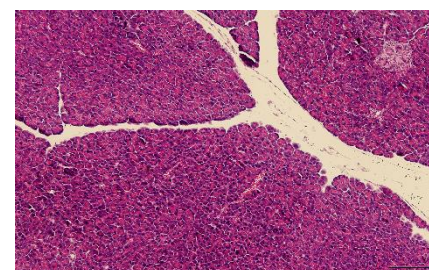

Additional represented photos for Figure 1C

Mouse 1

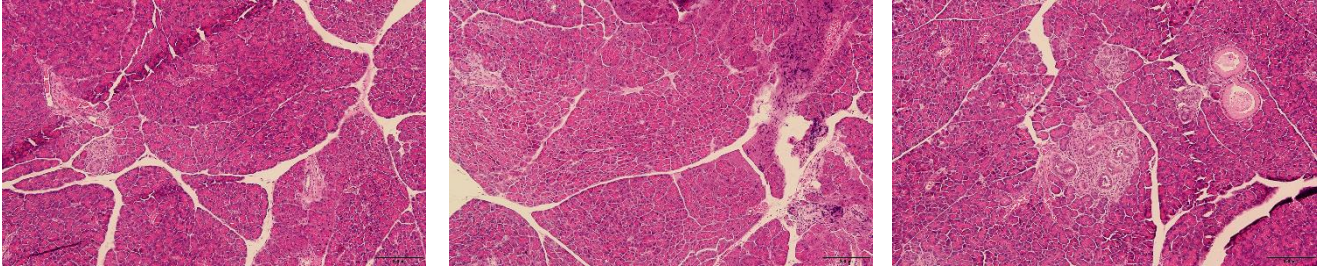

Mouse 2

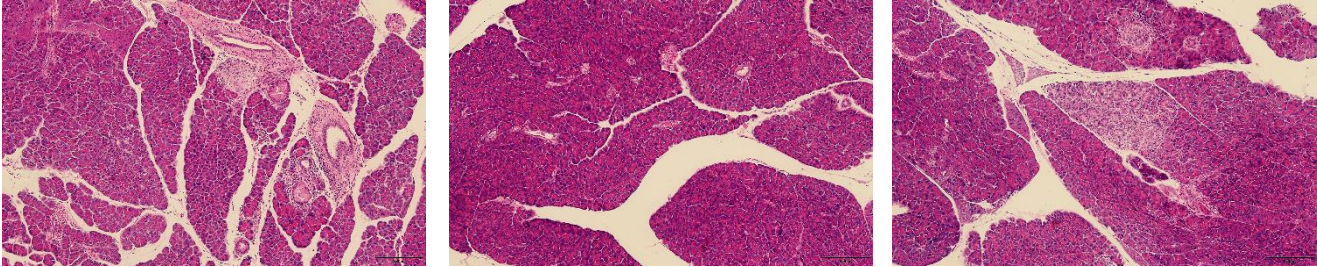

Additional represented photos for Figure 1D

Mouse 1

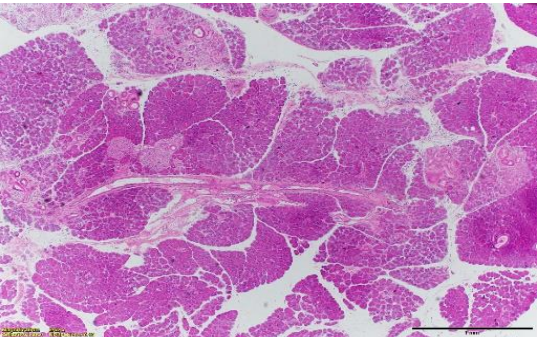

Mouse 2

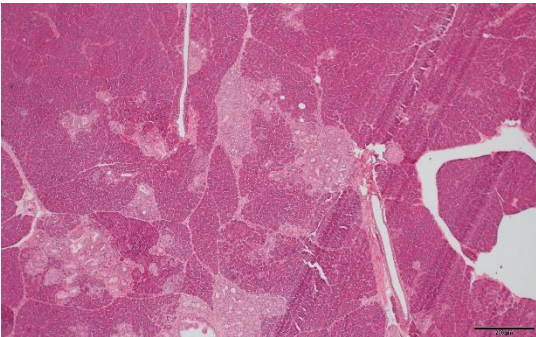

Mouse 3

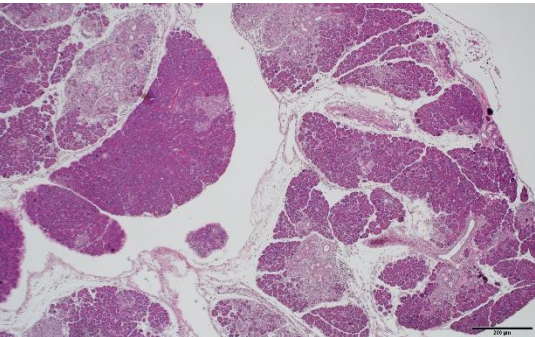

Mouse 4

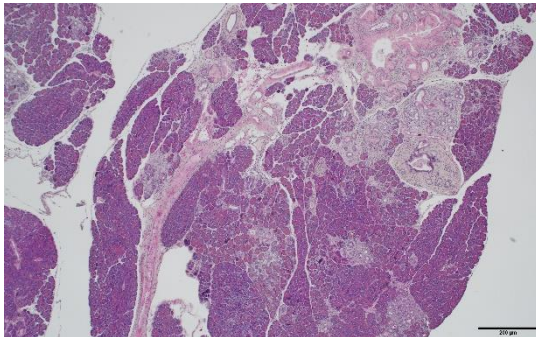

Additional represented photos for Figure 1E

Mouse 1

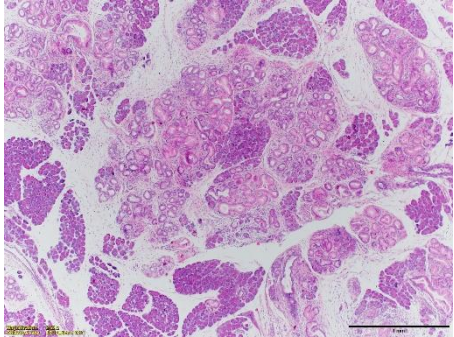

Mouse 2

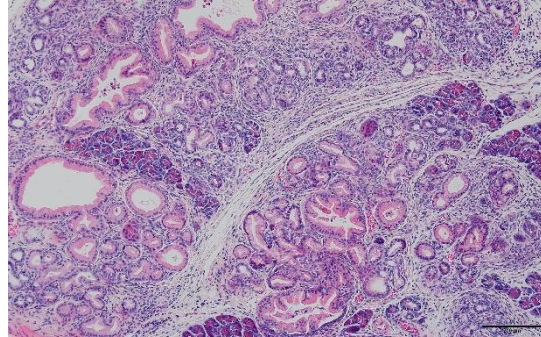

Mouse 3

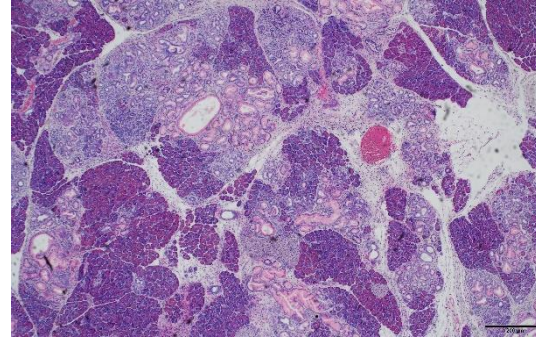

Mouse 4

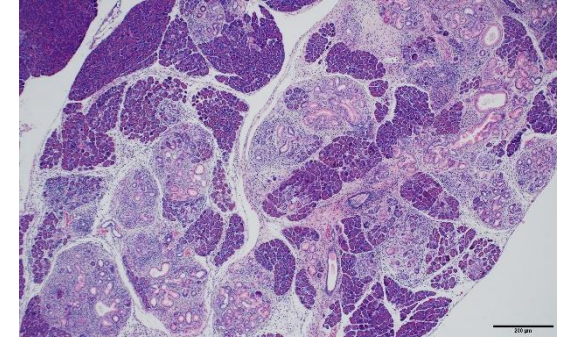

Mouse 5

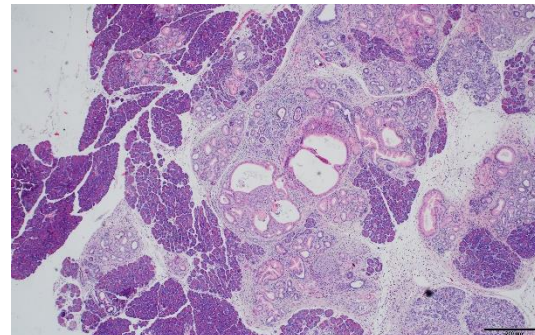

Additional represented photos for Figure 1F

Mouse 1

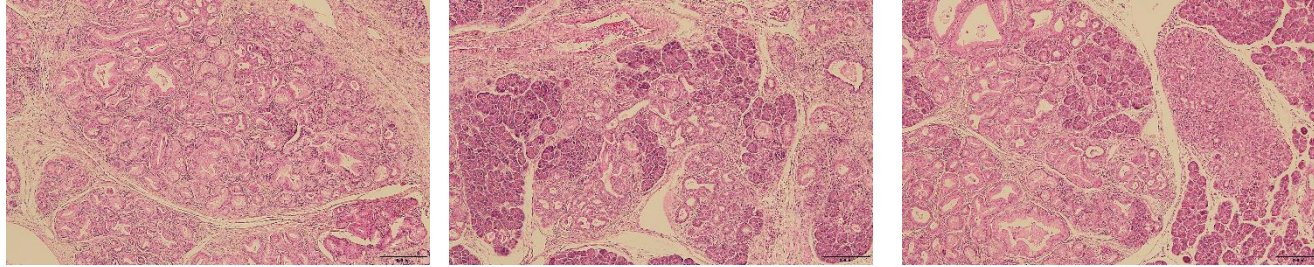

Additional represented photos for Figure 1G

Mouse 1

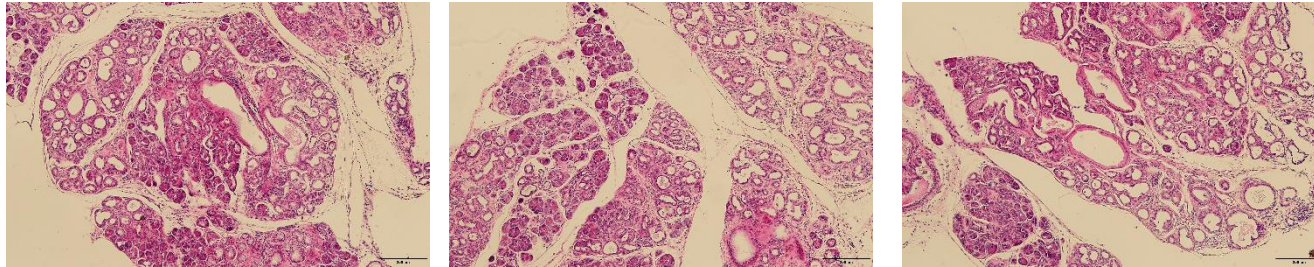

Additional represented photos for Figure 1H

Mouse 1

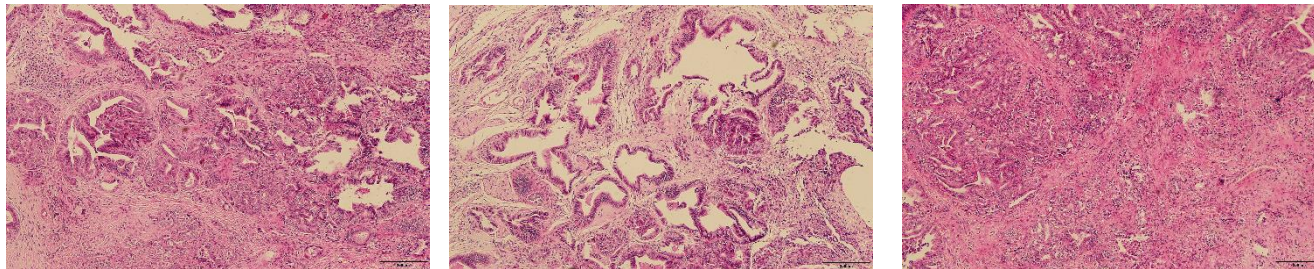

Additional represented photos for Figure 1J

Mouse 1

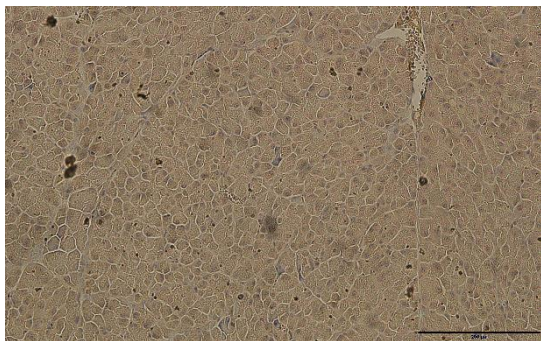

Mouse 2

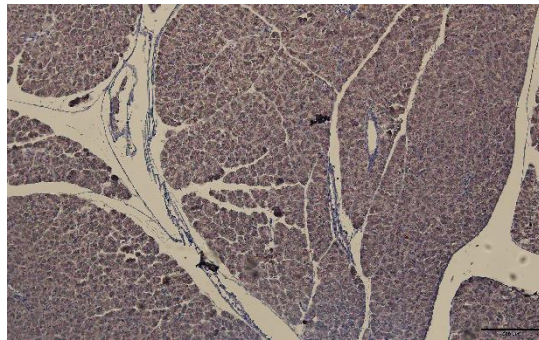

Mouse 3

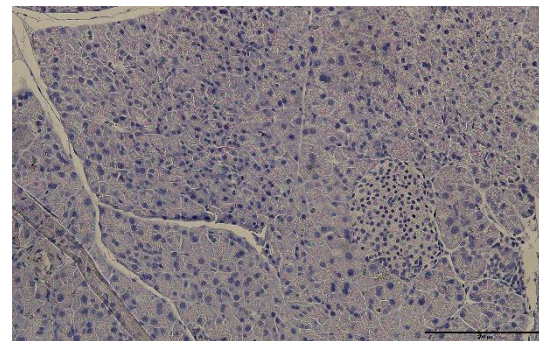

Anti-CD3

Additional represented photos for Figure 1K

Mouse 1

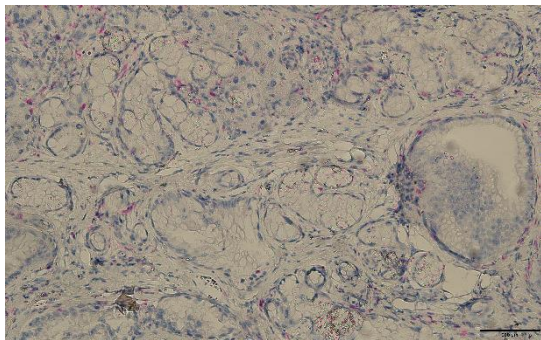

Mouse 2

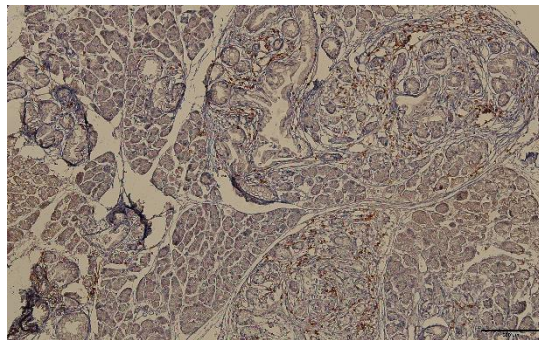

Mouse 3

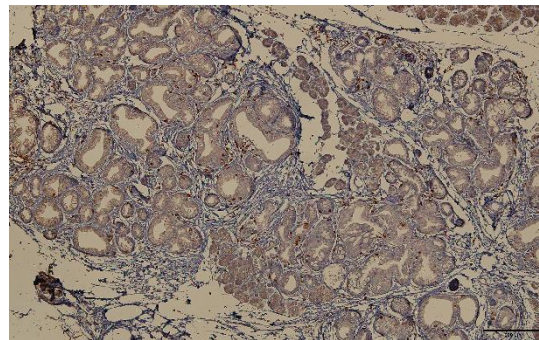

Anti-CD3

Additional represented photos for Figure 1L

Mouse 1

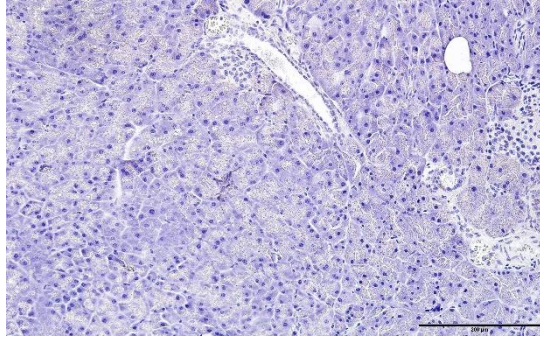

Mouse 2

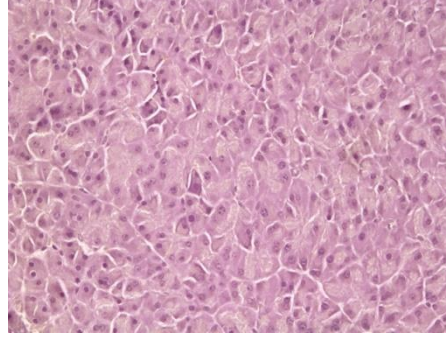

Anti- F4/80

Additional represented photos for Figure 1M

Mouse 1

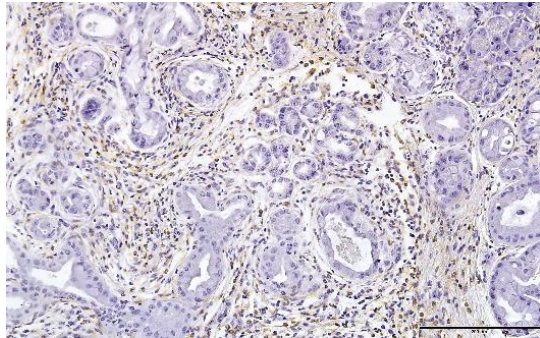

Mouse 2

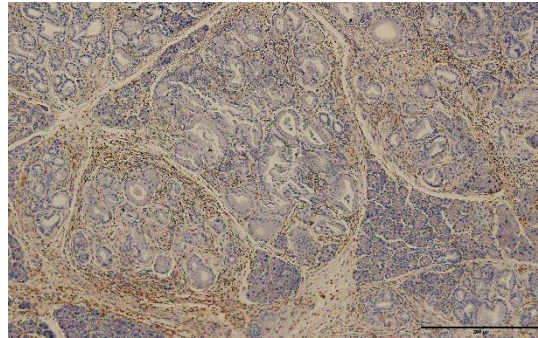

Mouse 3

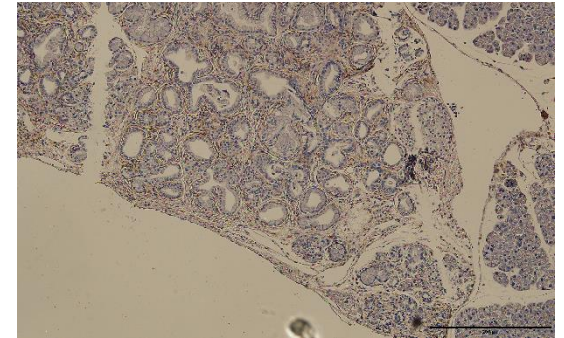

Anti- F4/80

Additional represented photos for Figure 3F

Anti-GKN1

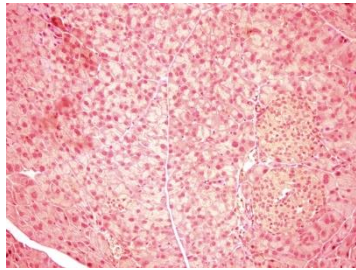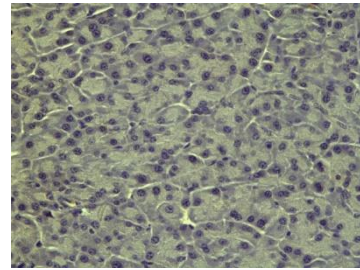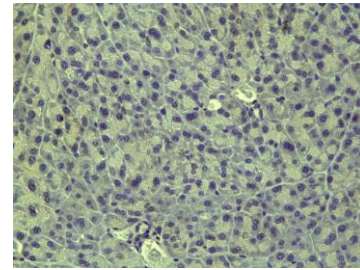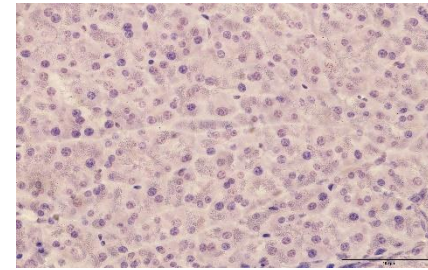

Additional represented photos for Figure 3G

MOUSE 1

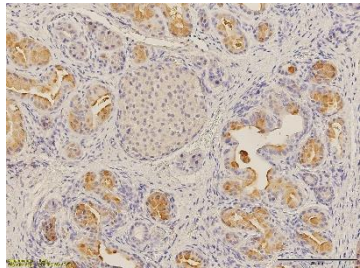

MOUSE 2

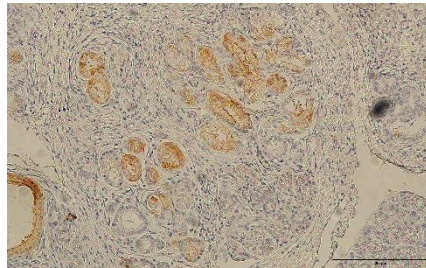

MOUSE 3

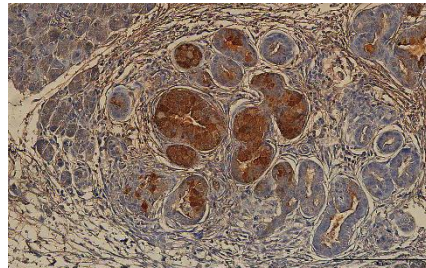

MOUSE 4

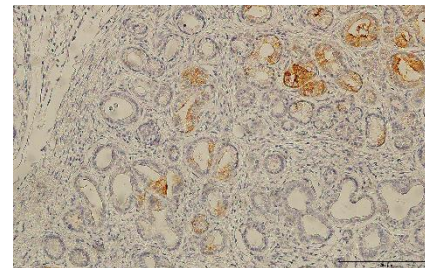

MOUSE 5

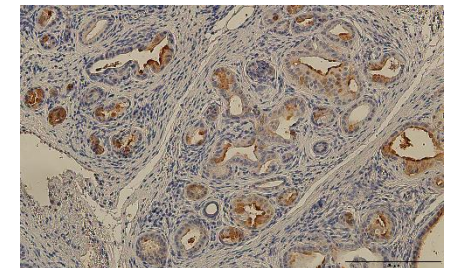

Additional represented photos for Figure 3H

MOUSE 1

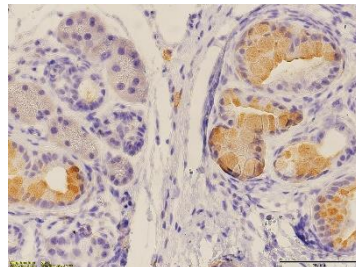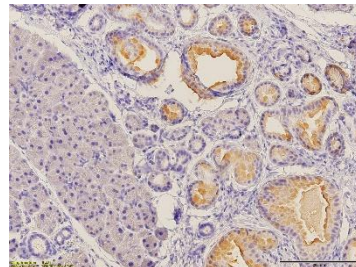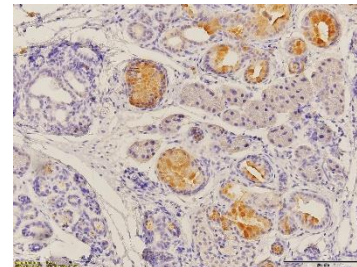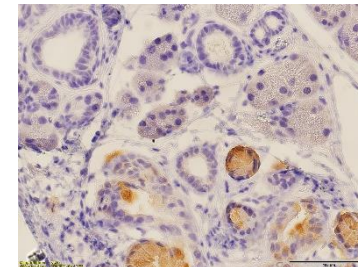



Additional represented photos for Figure 3I

MOUSE 1

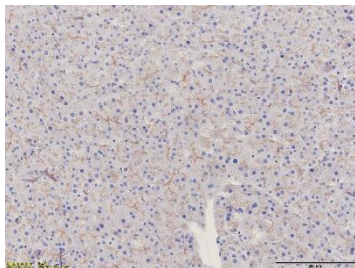

MOUSE 2

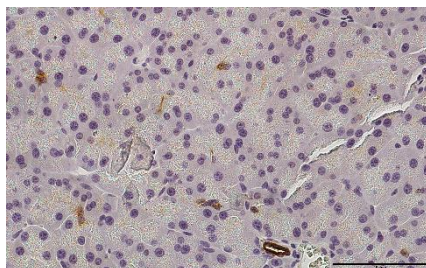

MOUSE 3

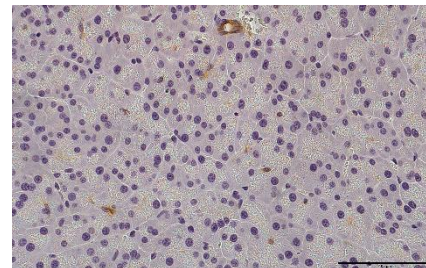

Anti-KRT19

Additional represented photos for Figure 3J

MOUSE 1

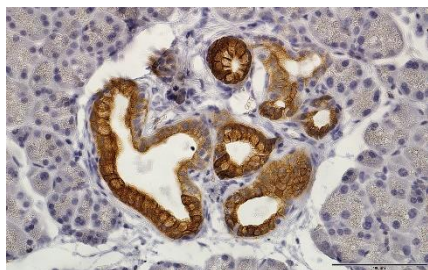

MOUSE 2

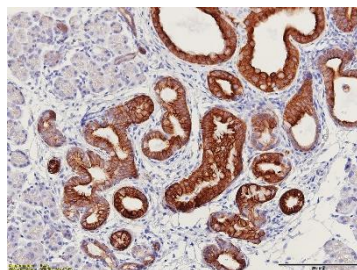

MOUSE 3

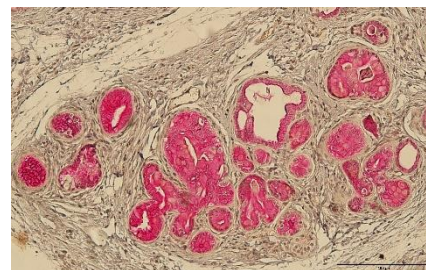

Additional represented photos for Figure 3K

MOUSE 1

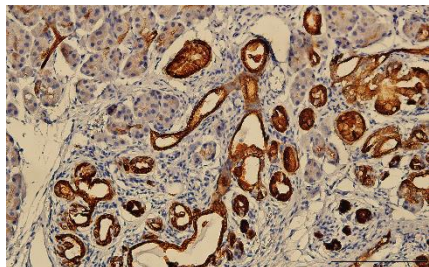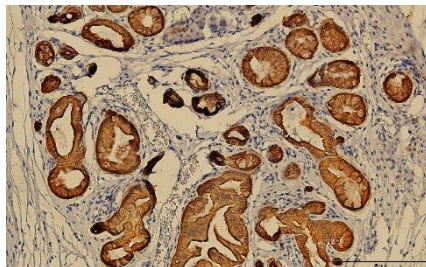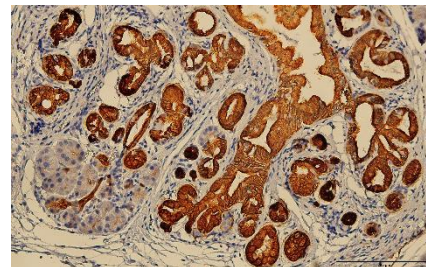

Anti-onecut2

Additional represented photos for Supplementary Figure 4k

MOUSE 1

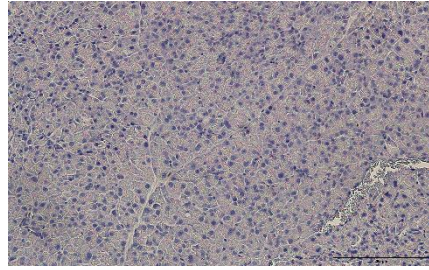

MOUSE 2

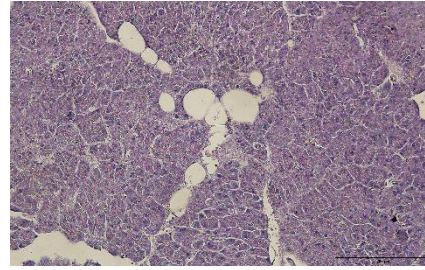

MOUSE 3

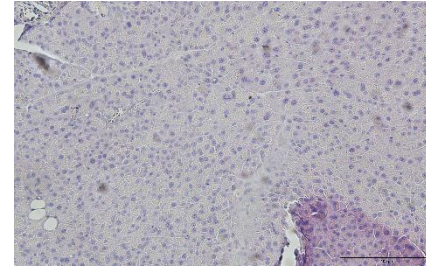

Additional represented photos for Supplementary Figure 4L

MOUSE 1

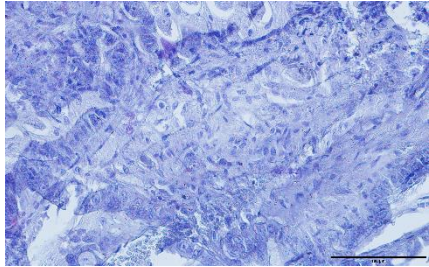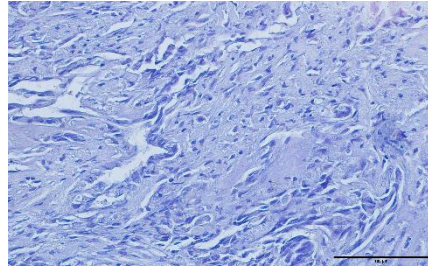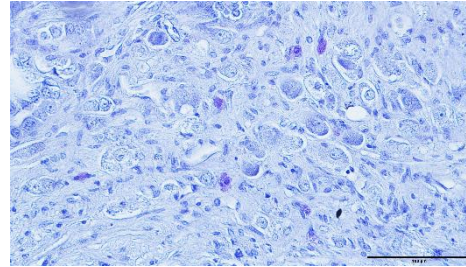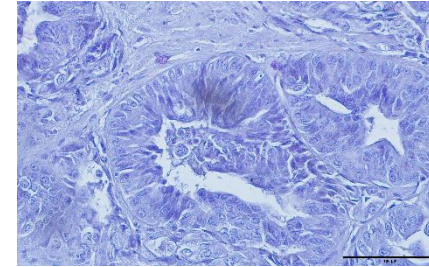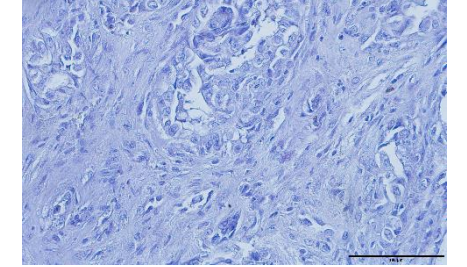

Additional represented photos for Supplementary Figure 4M

2.6.19 HPDAC

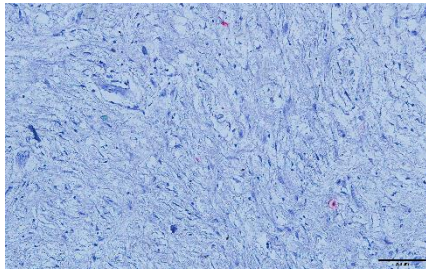

9.1.18 HPDAC

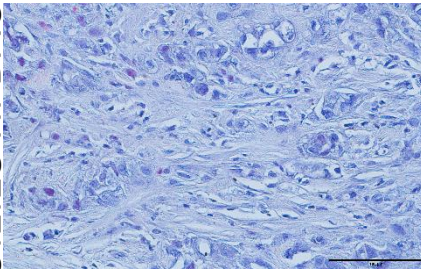

11.4.18 HPDAC

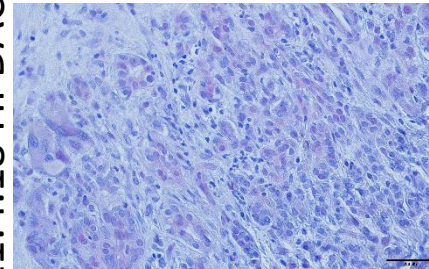

12.12.18 HPDAC

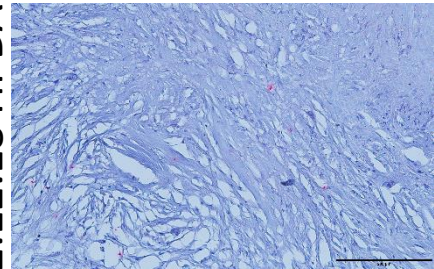

Anti-DCLK1 + Anti-Muc5ac

Additional represented photos for Figure 5A

MOUSE 1

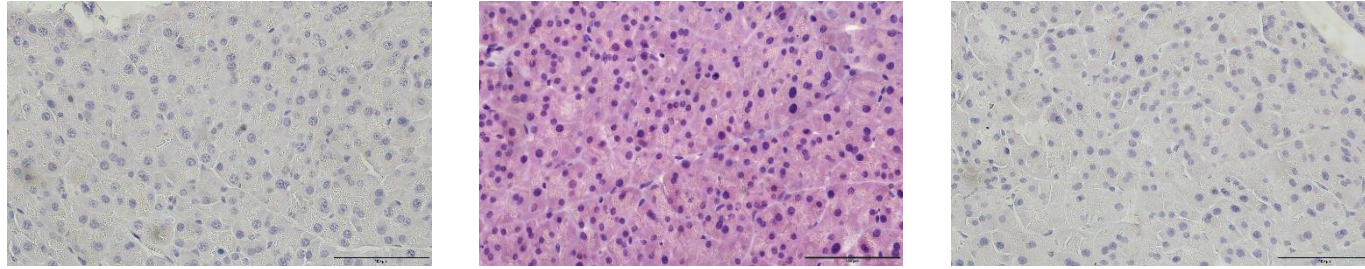

Additional represented photos for Figure 5B

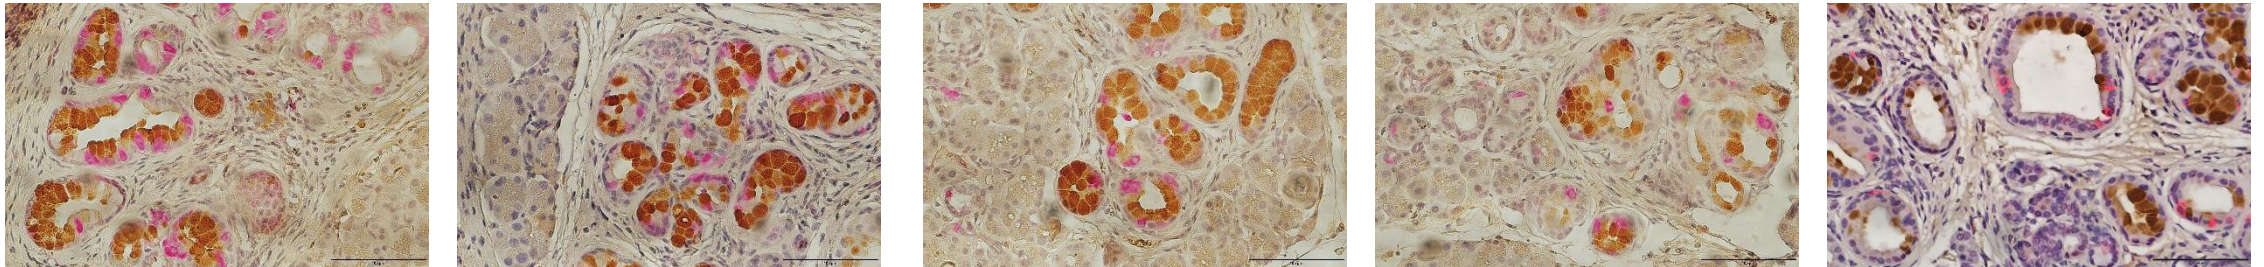

Additional represented photos for Figure 5C

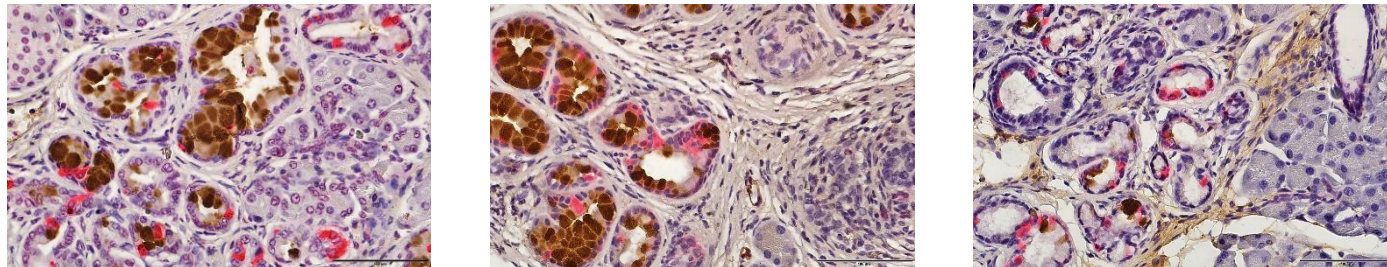

Anti-Tgfb1 + Anti-Muc5ac

Additional represented photos for Figure 5F

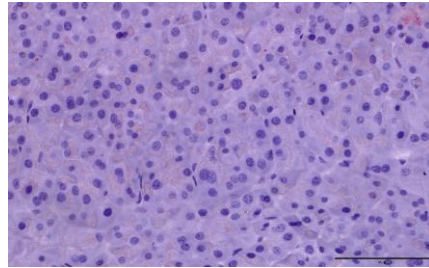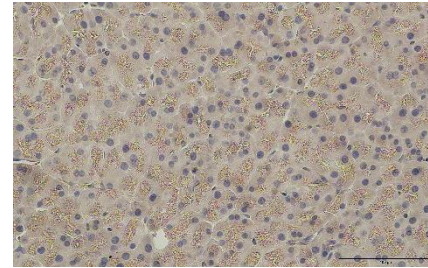

Additional represented photos for Figure 5I

MOUSE 1

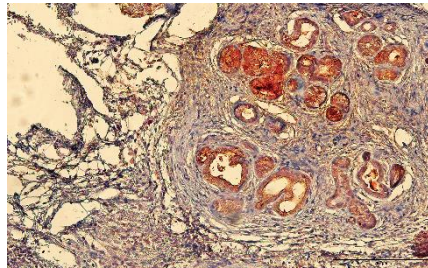

MOUSE 2

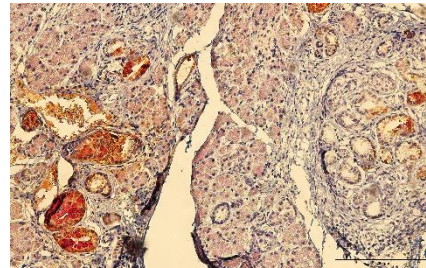

MOUSE 3

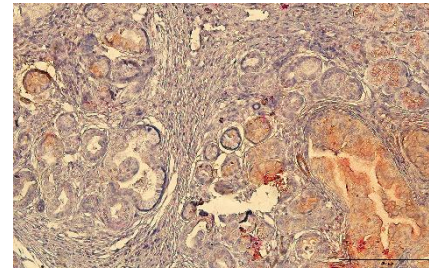

Additional represented photos for Supplementary Figure 7C-D

Anti-TFF1

11.04.18 HPDAC

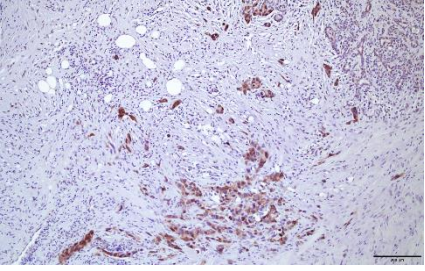

09.01.18 HPDAC

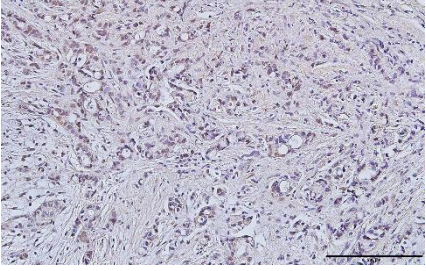

25.5.19 HPDAC

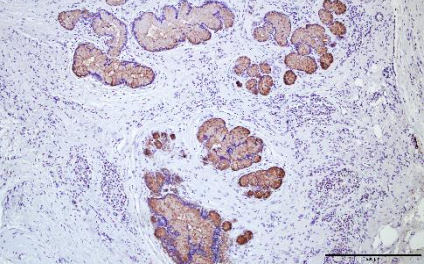

27.3.18 HPDAC

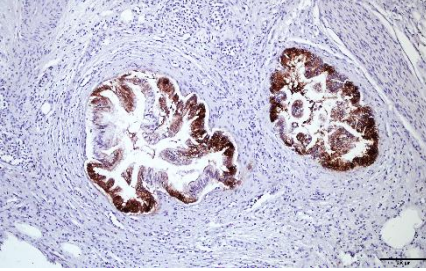

Additional represented photos for Supplementary Figure 7E-F

Anti-Tgfb1

11.04.18 HPDAC

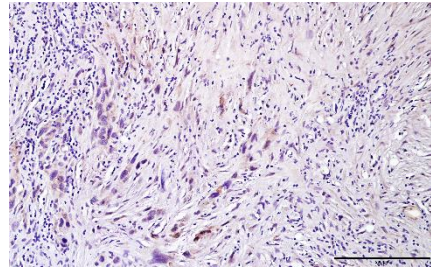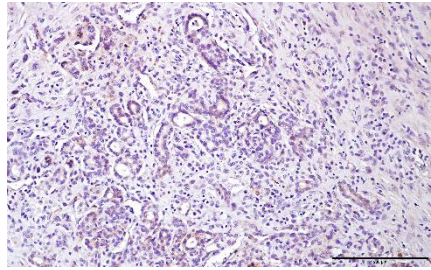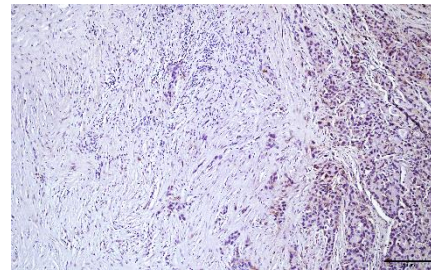

27.3.18 HPDAC

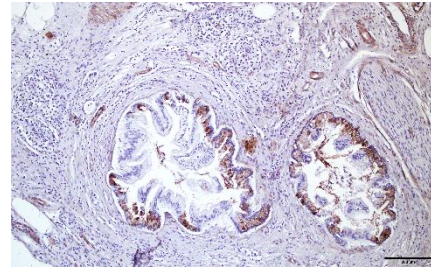

Additional represented photos for Supplementary Figure 8E-F

MOUSE 1

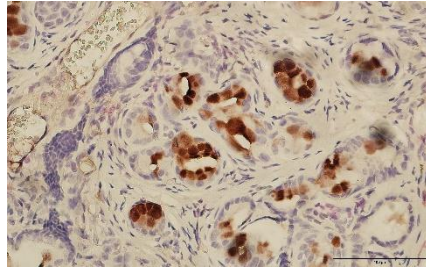

MOUSE 2

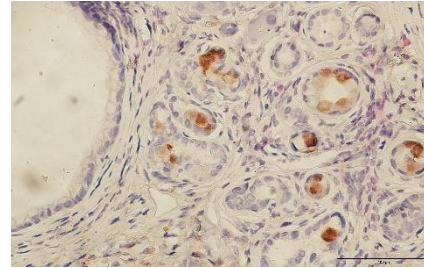

MOUSE 3

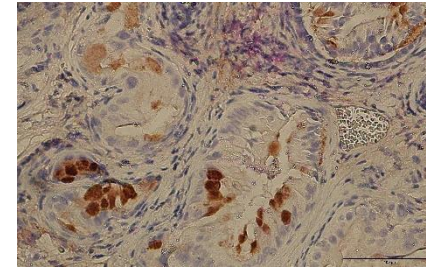

Anti-CD3 + Anti- Muc5ac

Additional represented photos for Supplementary Figure 8G-H

MOUSE 1

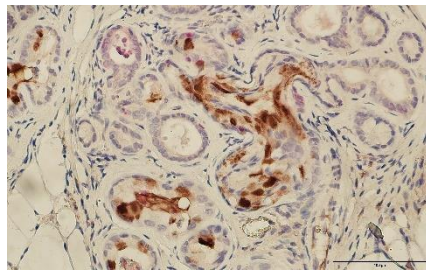

MOUSE 2

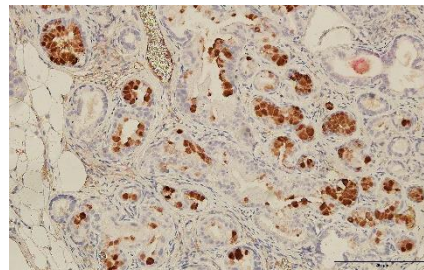

MOUSE 3

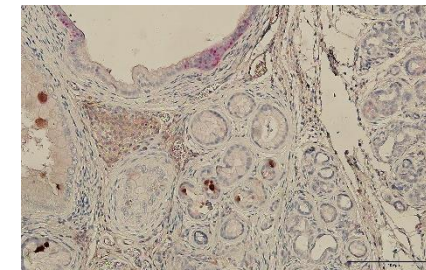

Anti-Ly6g + Anti- Muc5ac

Additional represented photos for Supplementary Figure 8C-D

MOUSE 1

MOUSE 2

MOUSE 3

Anti-CD3

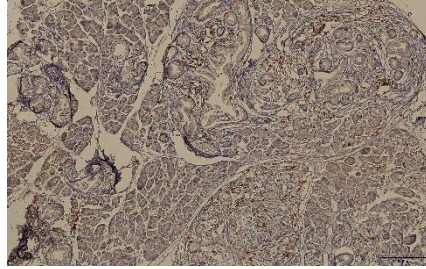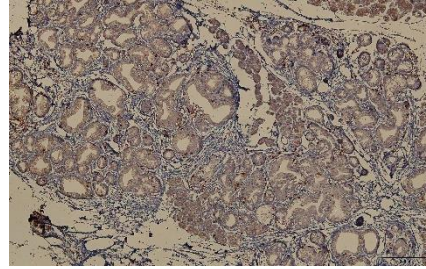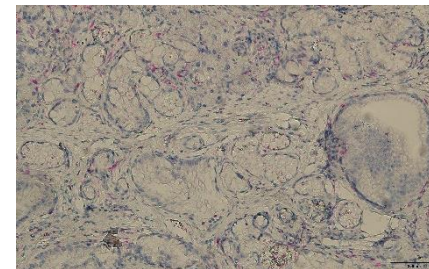

Additional represented photos for Supplementary Figure 8E-F

MOUSE 1

MOUSE 2

MOUSE 3

Anti-CD3 + Anti- Muc5ac

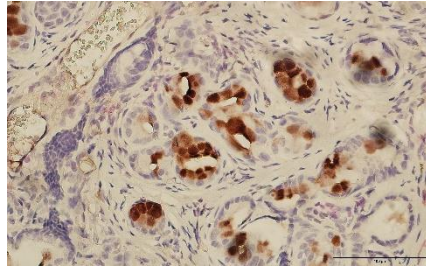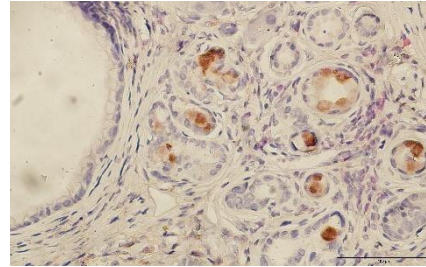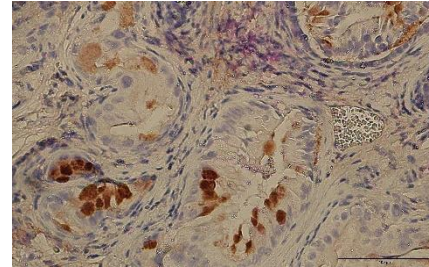

Additional represented photos for Supplementary Figure 8G-H

MOUSE 1

MOUSE 2

MOUSE 3

Anti-Ly6g + Anti- Muc5ac

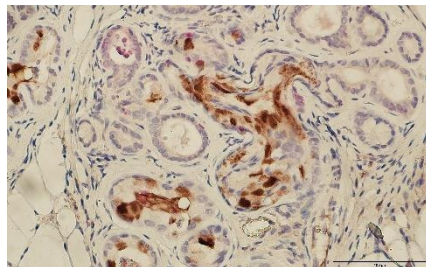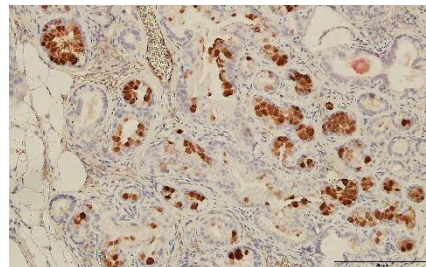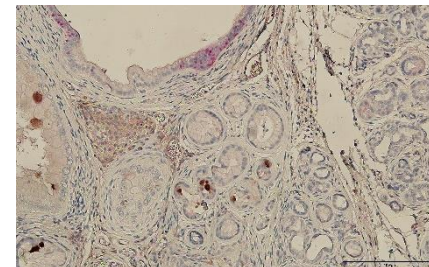

Microscopy images- quantification



Anti-DCLK1

MOUSE#1

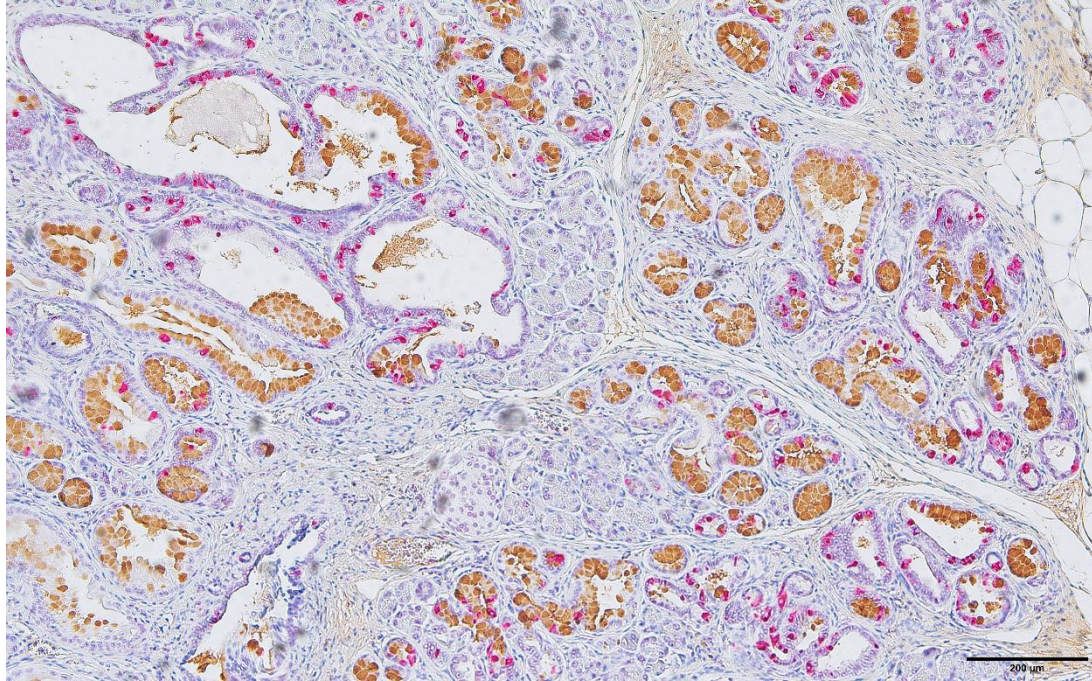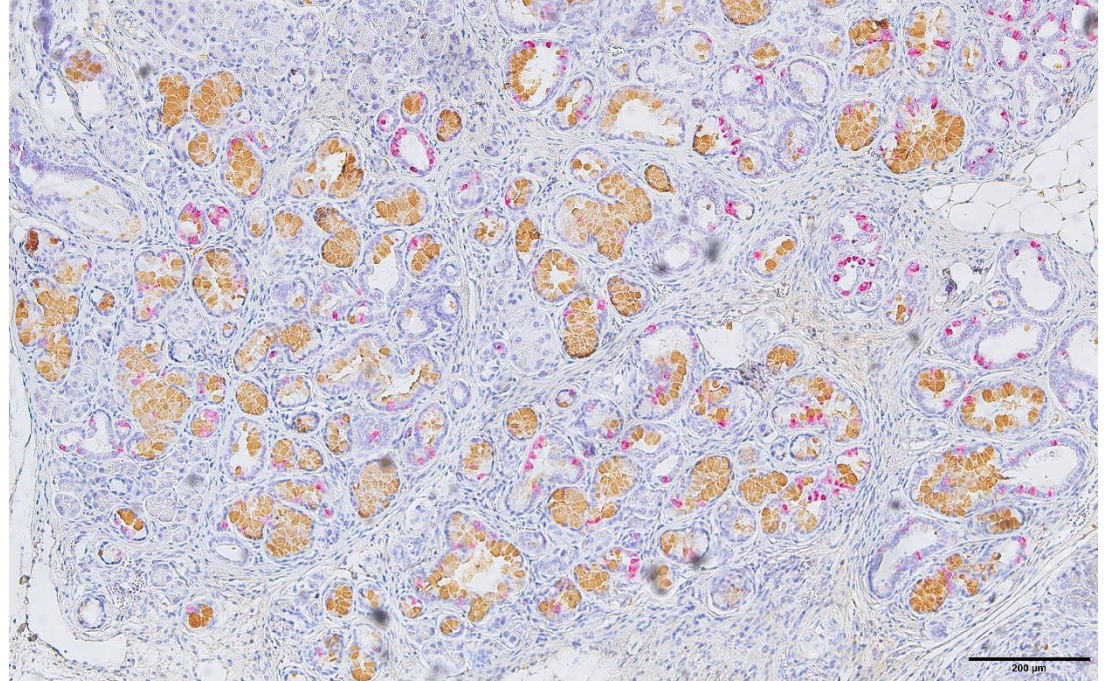

Additional represented photos for Figure 4E

Anti-DCLK1

MOUSE#2

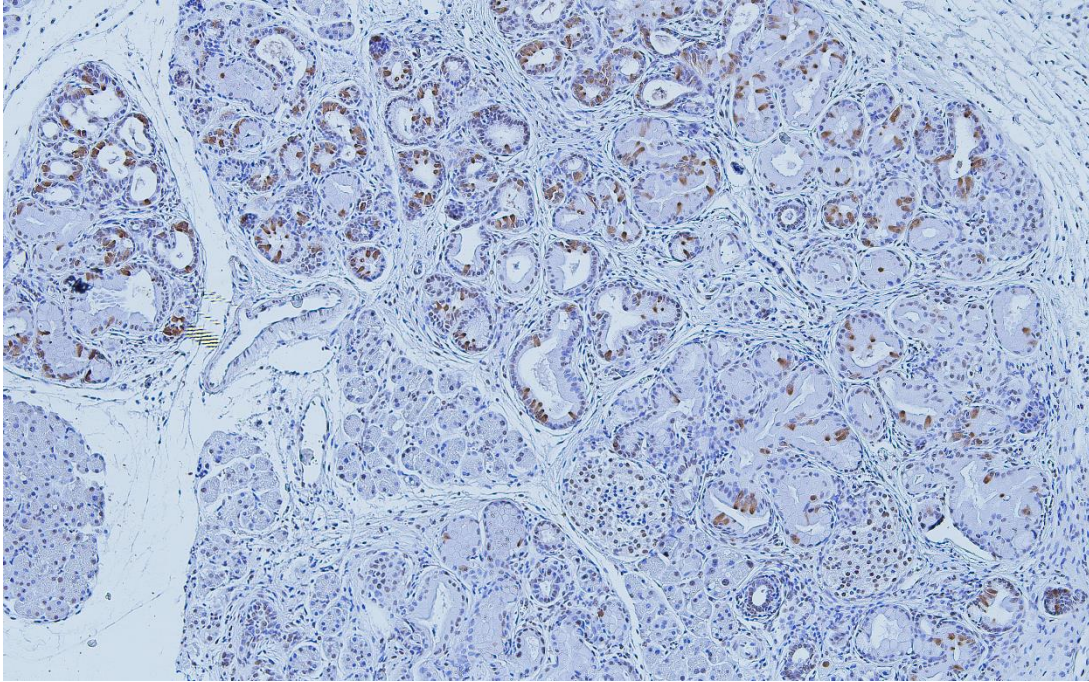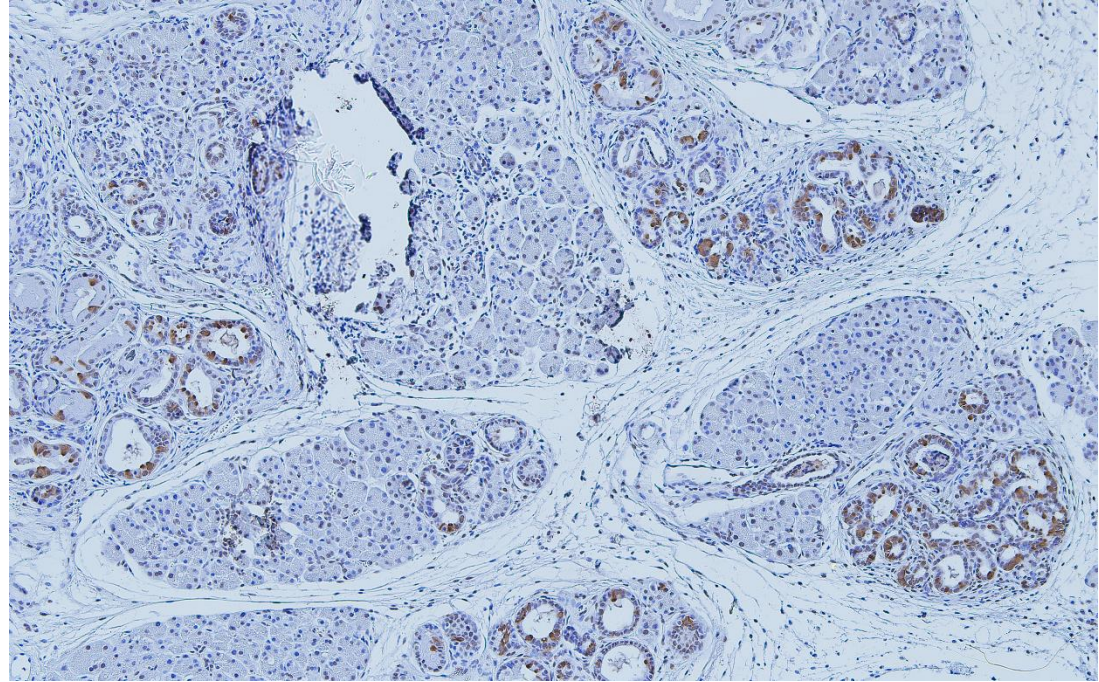

Additional represented photos for Figure 4E

Anti-DCLK1

MOUSE#3

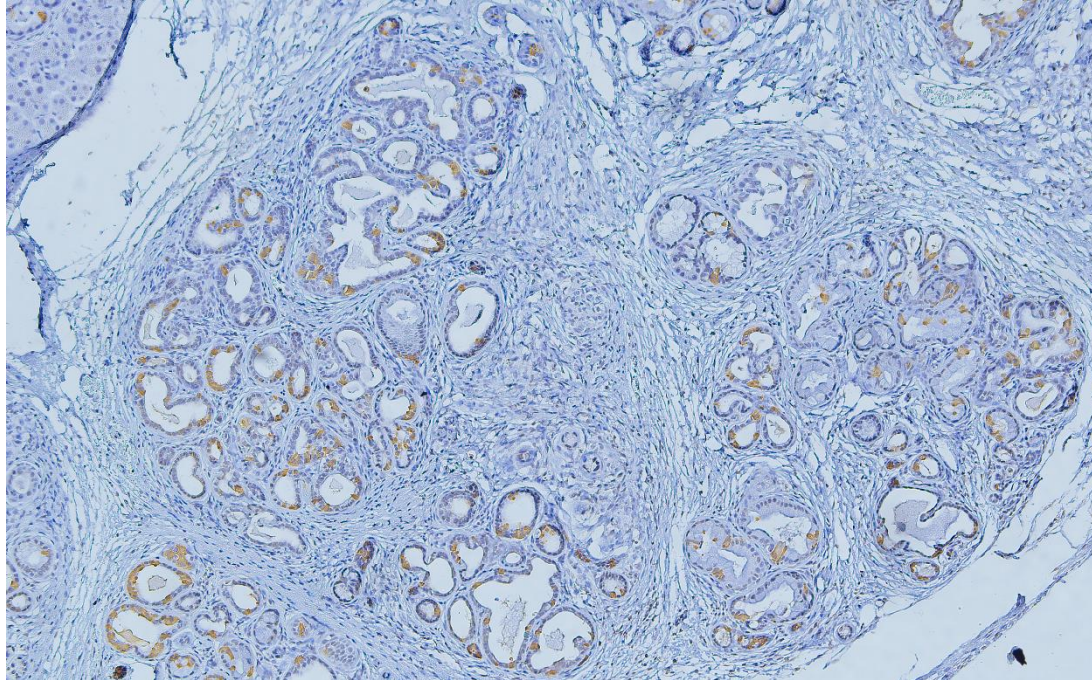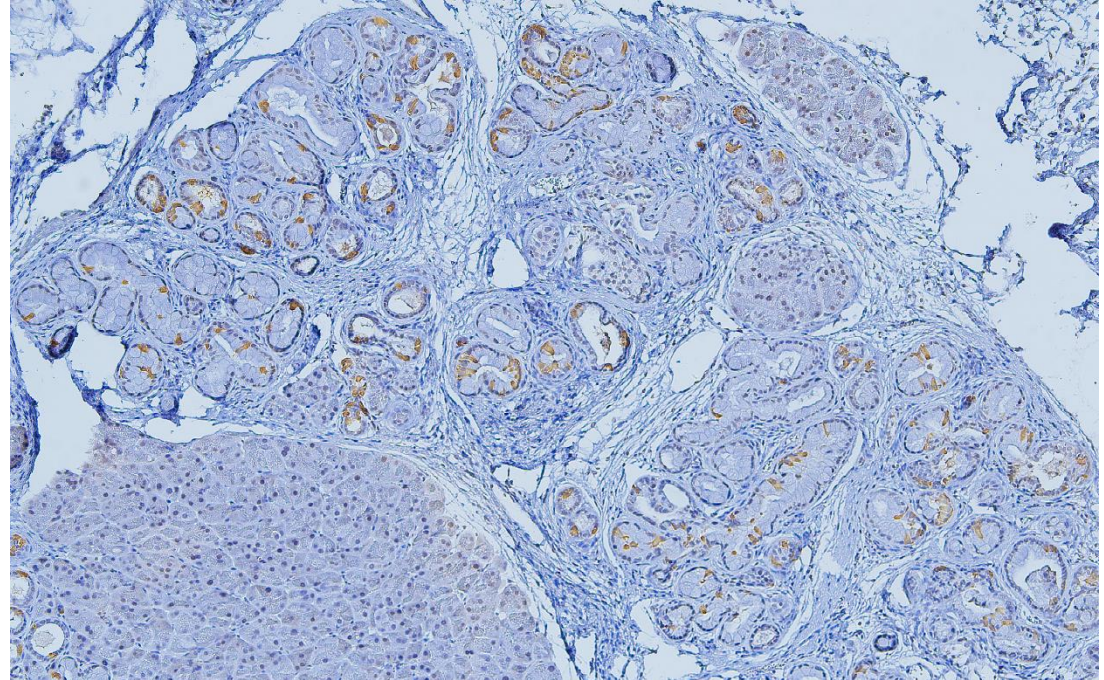

Additional represented photos for Figure 4E

Anti-TFF1  
MOUSE#1

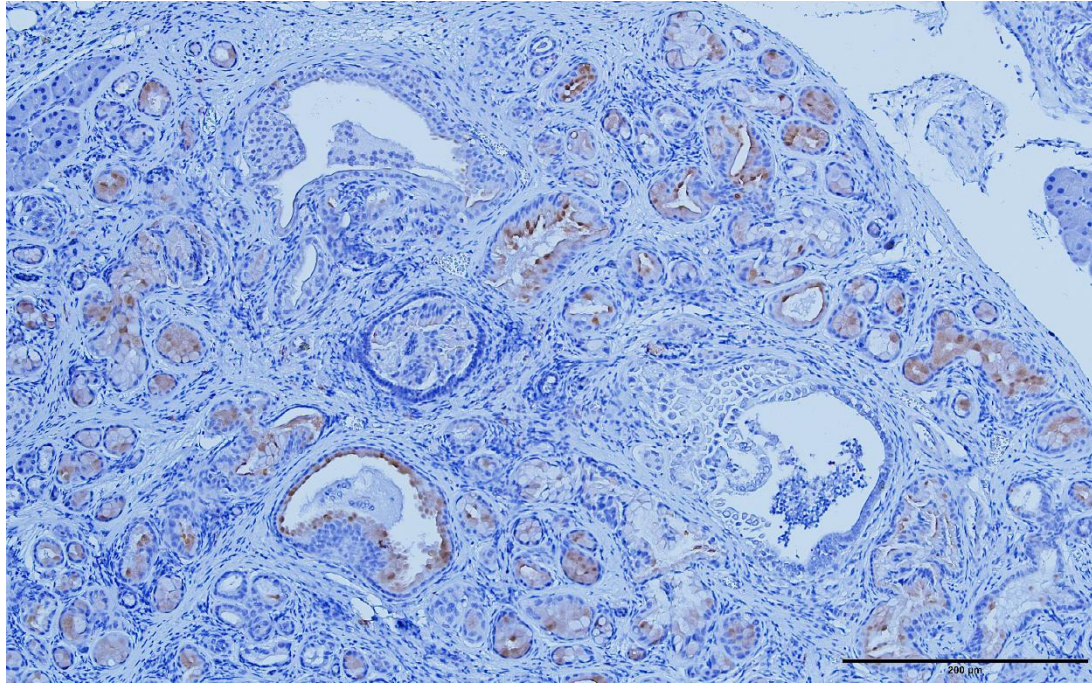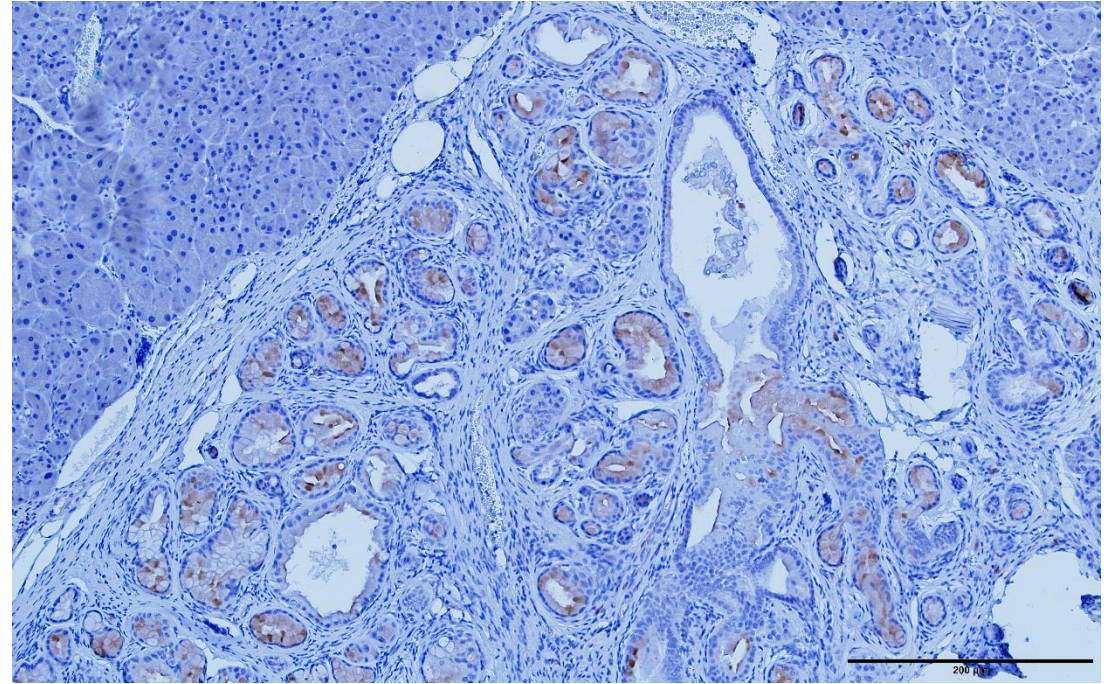

Additional represented photos for Figure 4N

Anti-TFF1

MOUSE#2

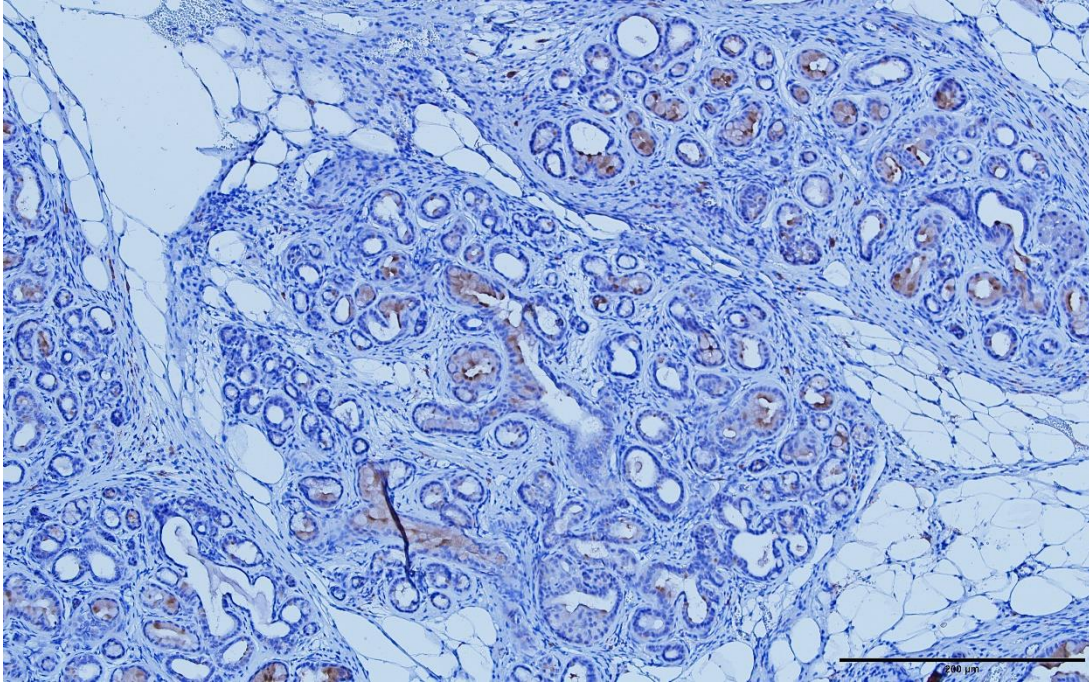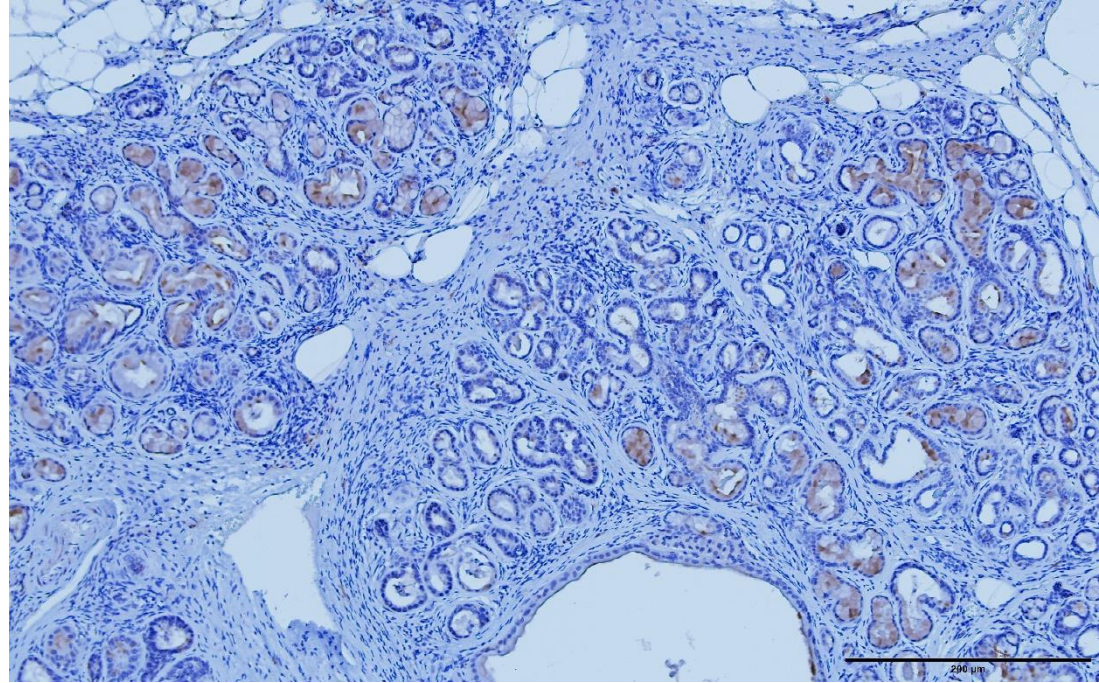

Additional represented photos for Figure 4N

Anti-TFF1  
MOUSE#3

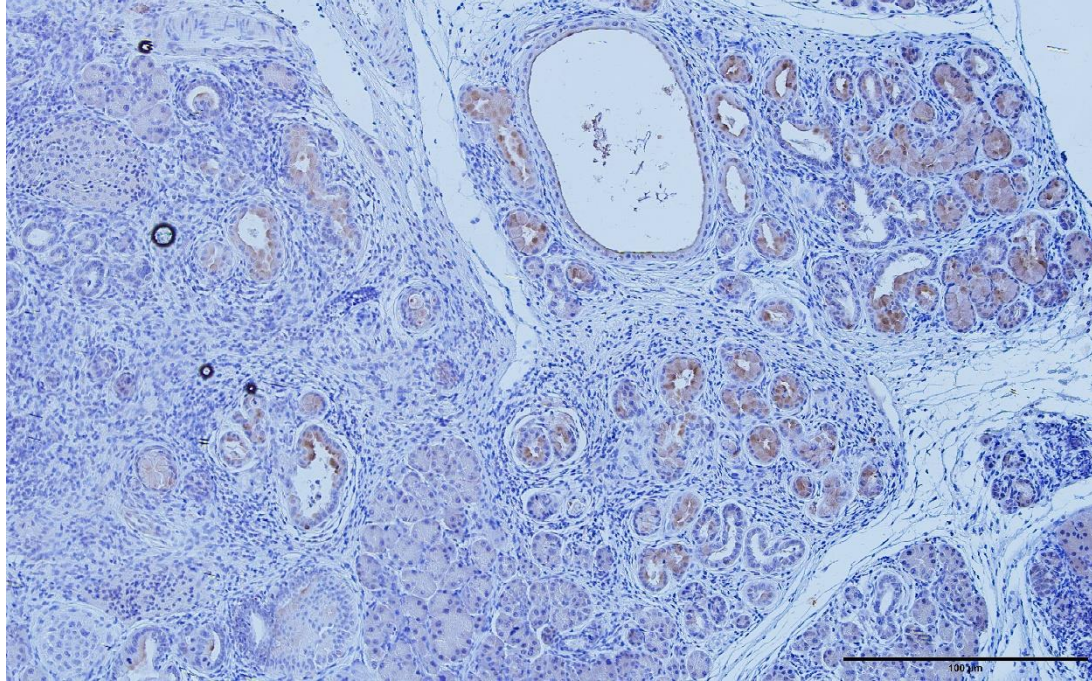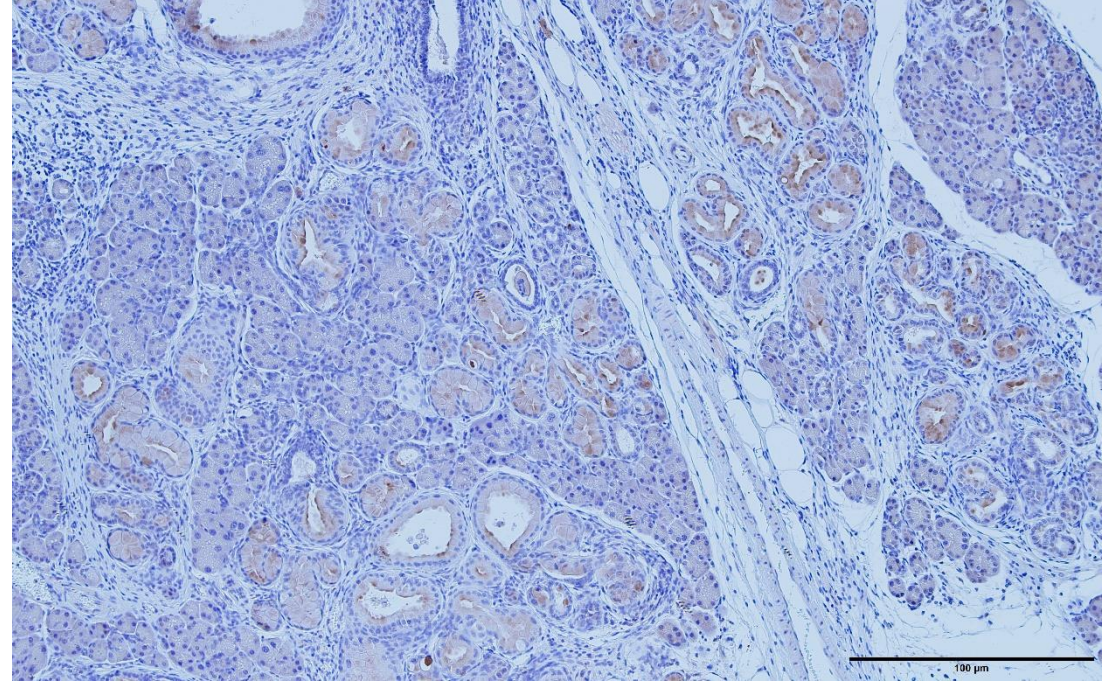

Additional represented photos for Figure 4N

Anti-MKi67

MOUSE#1

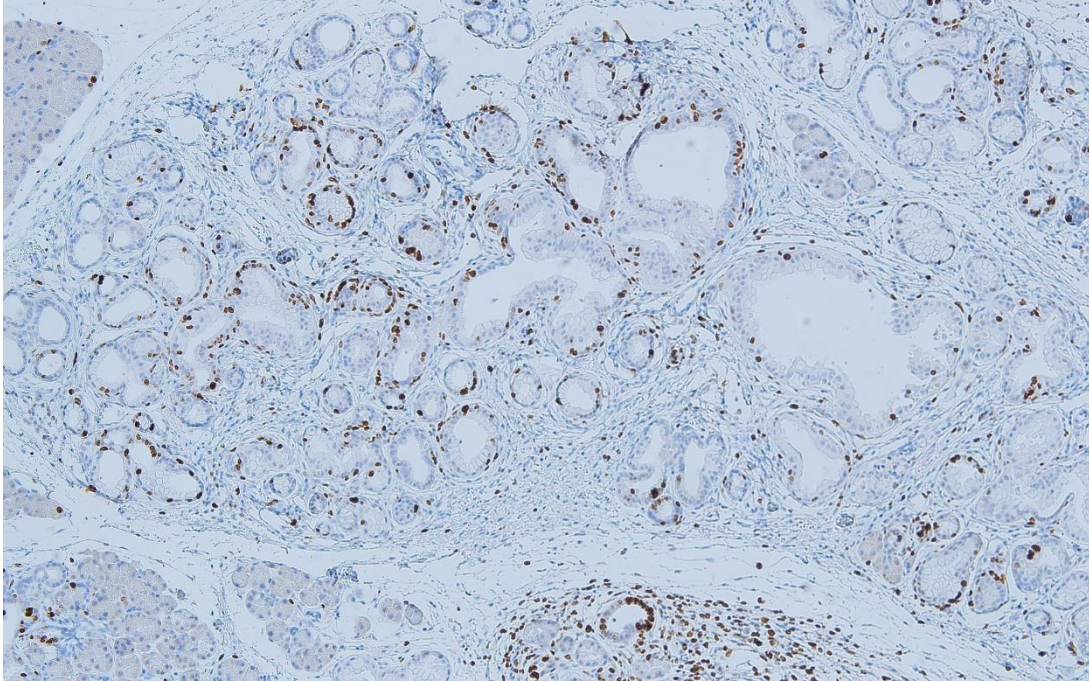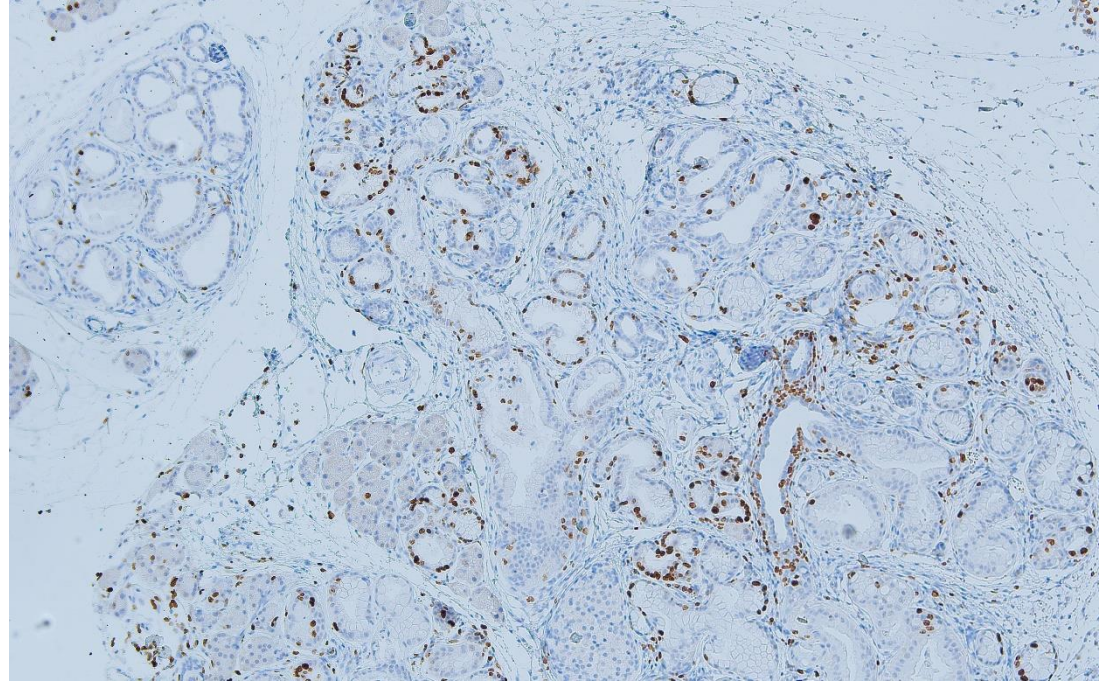

Additional represented photos for Figure 4P

Anti-MKi67

MOUSE#2

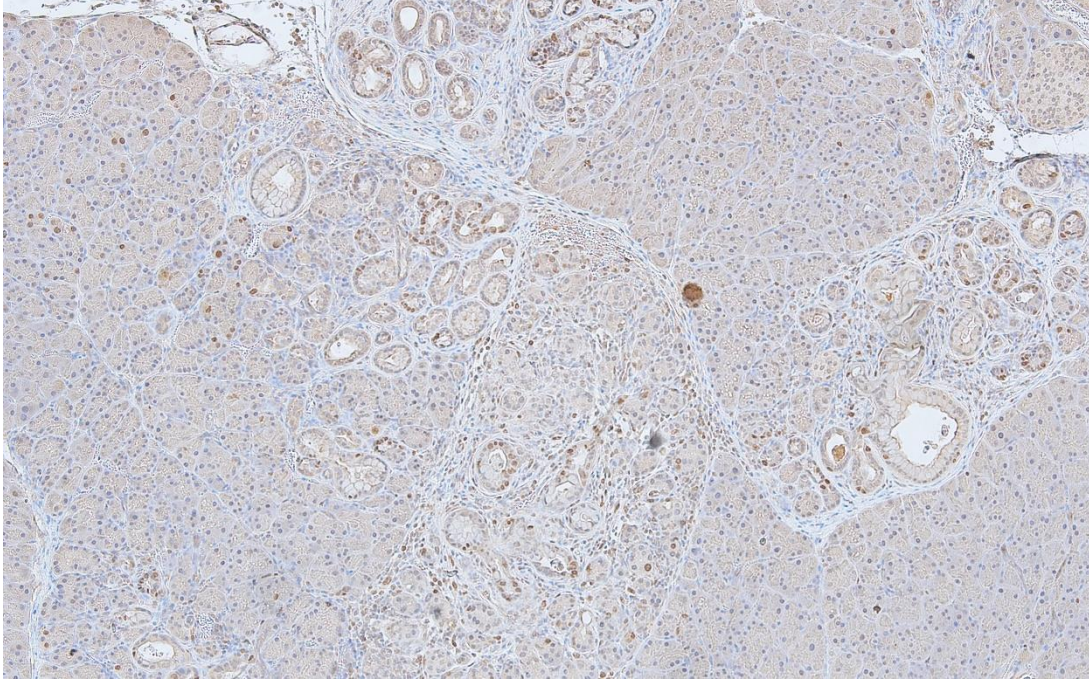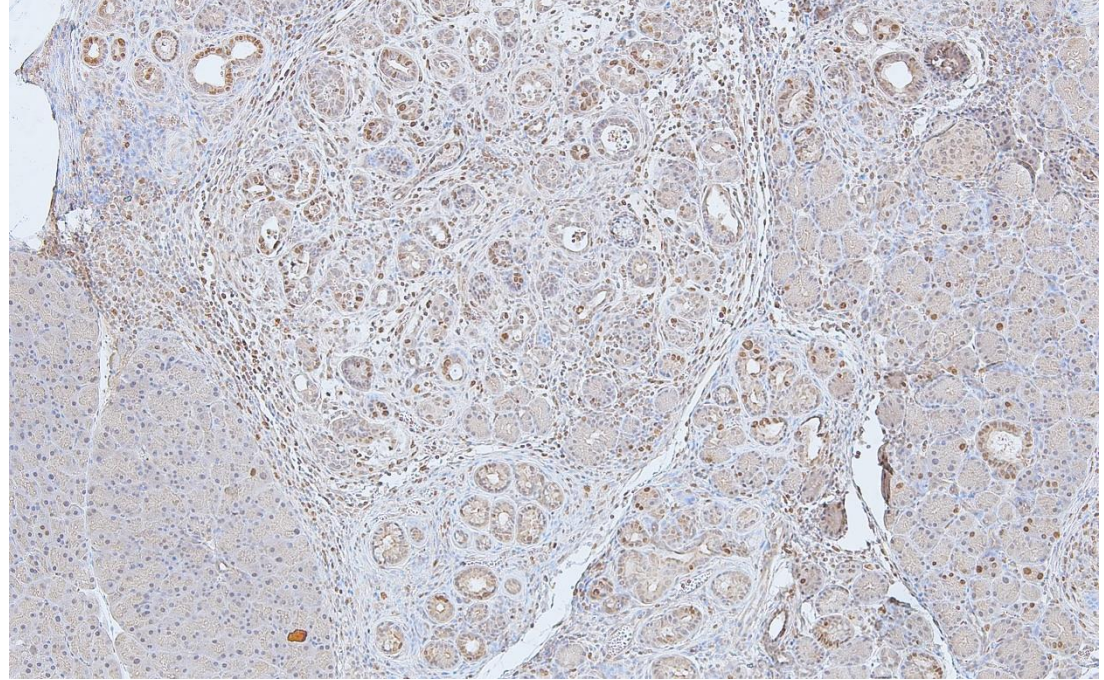

Additional represented photos for Figure 4P



Anti-MKi67

MOUSE#3

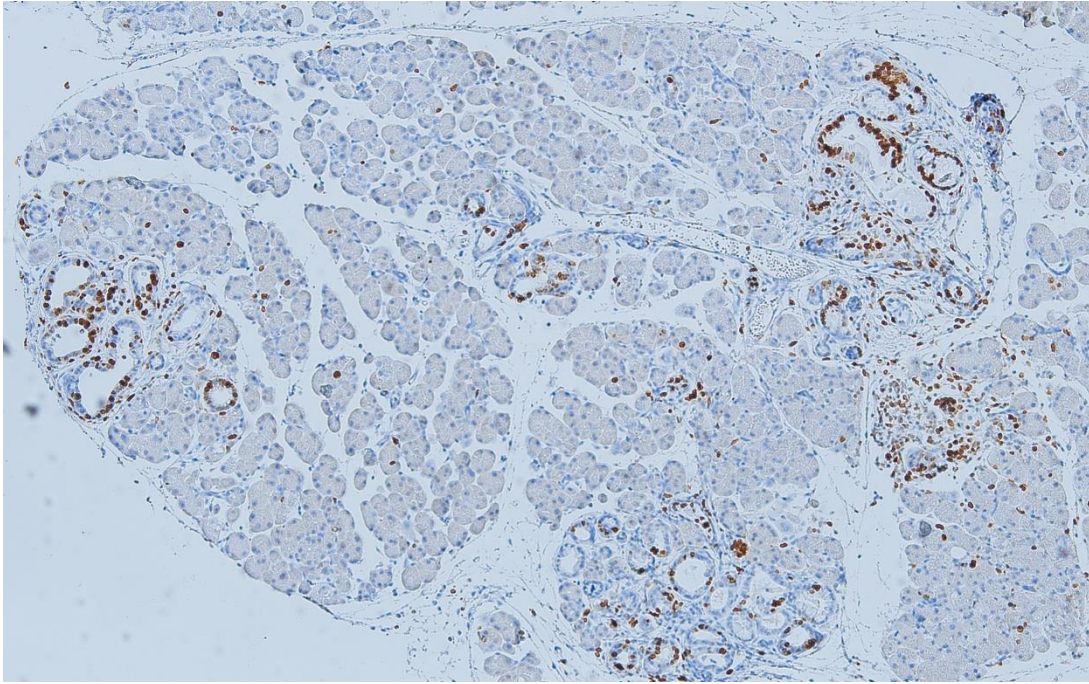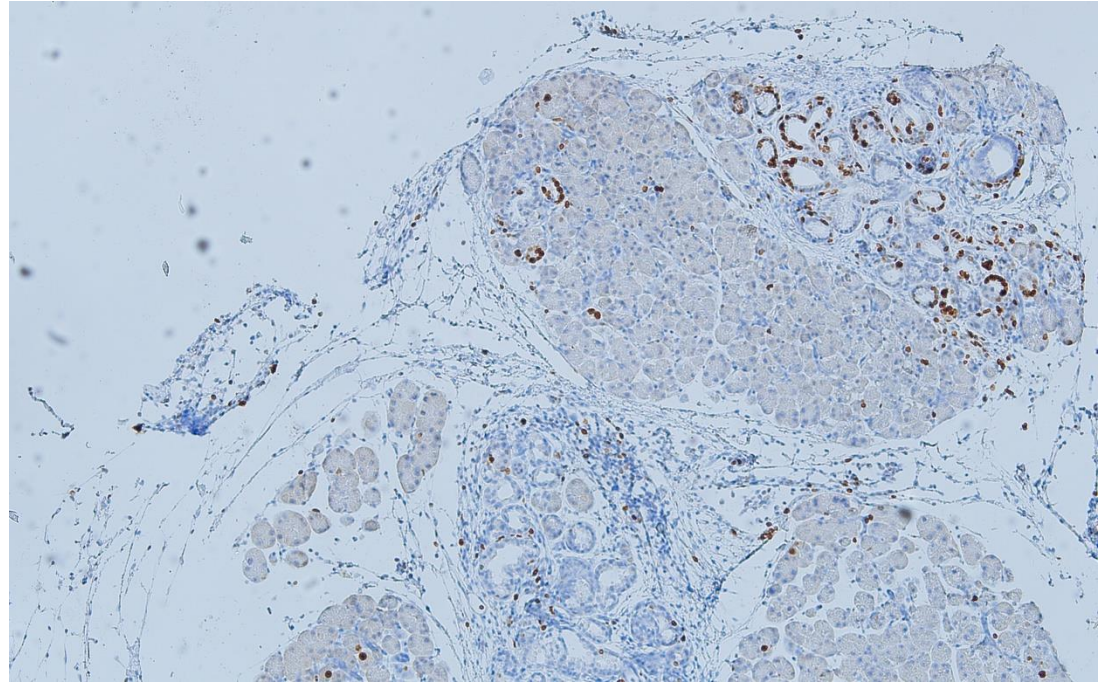

Additional represented photos for Figure 4P

Anti-TGFb1

MOUSE#1

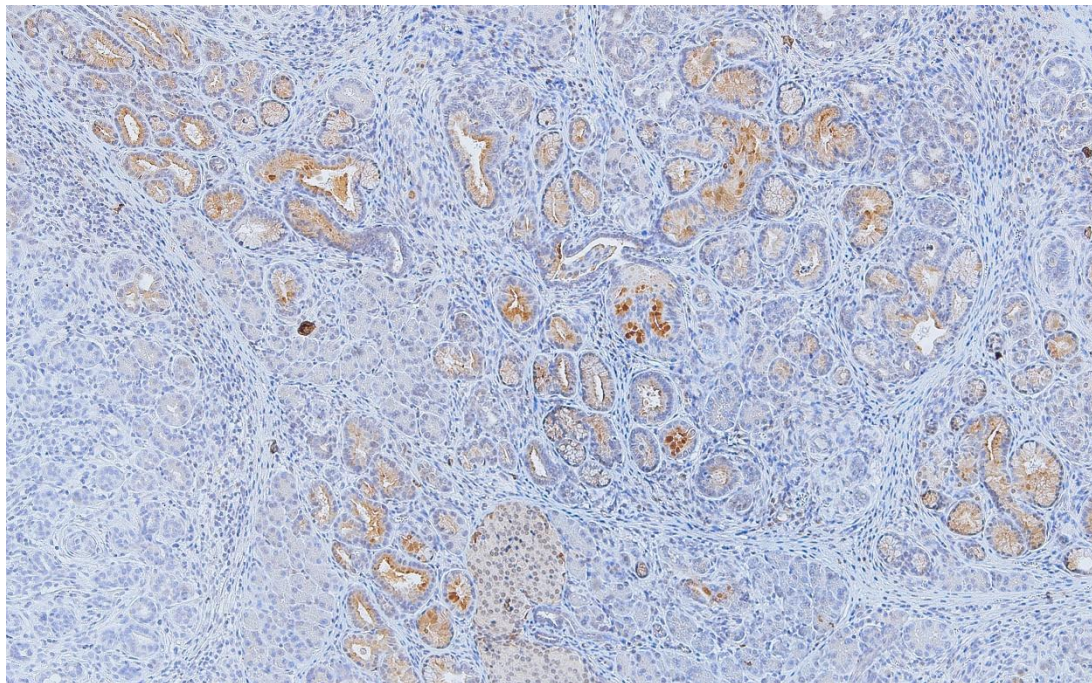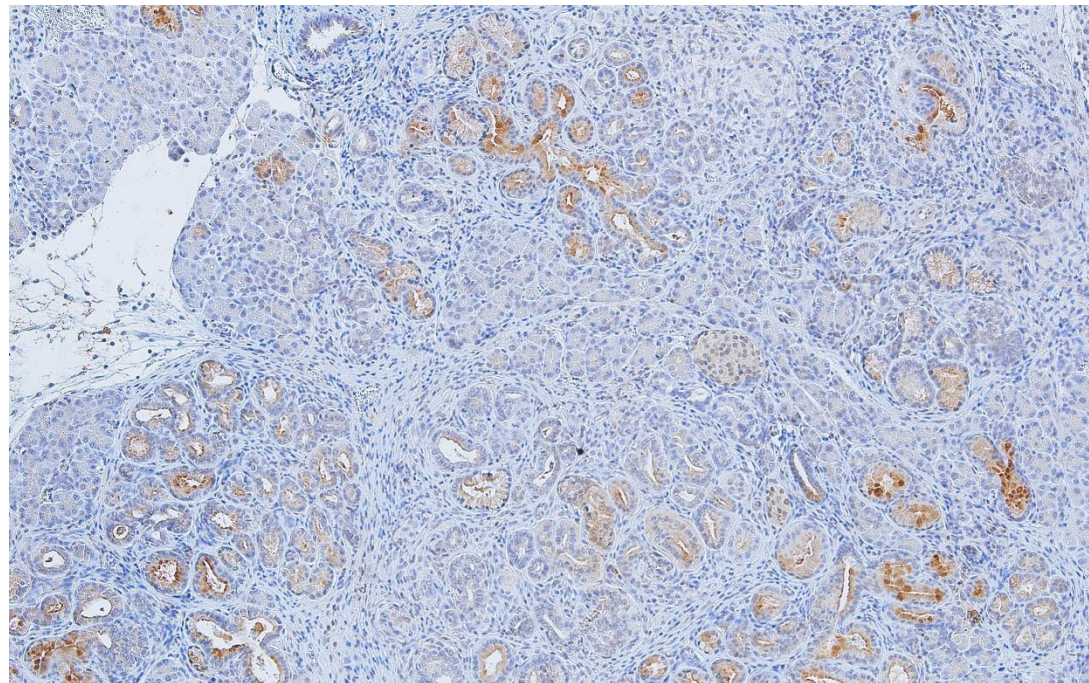

Additional represented photos for Figure 4G

Anti-TGFb1

MOUSE#2

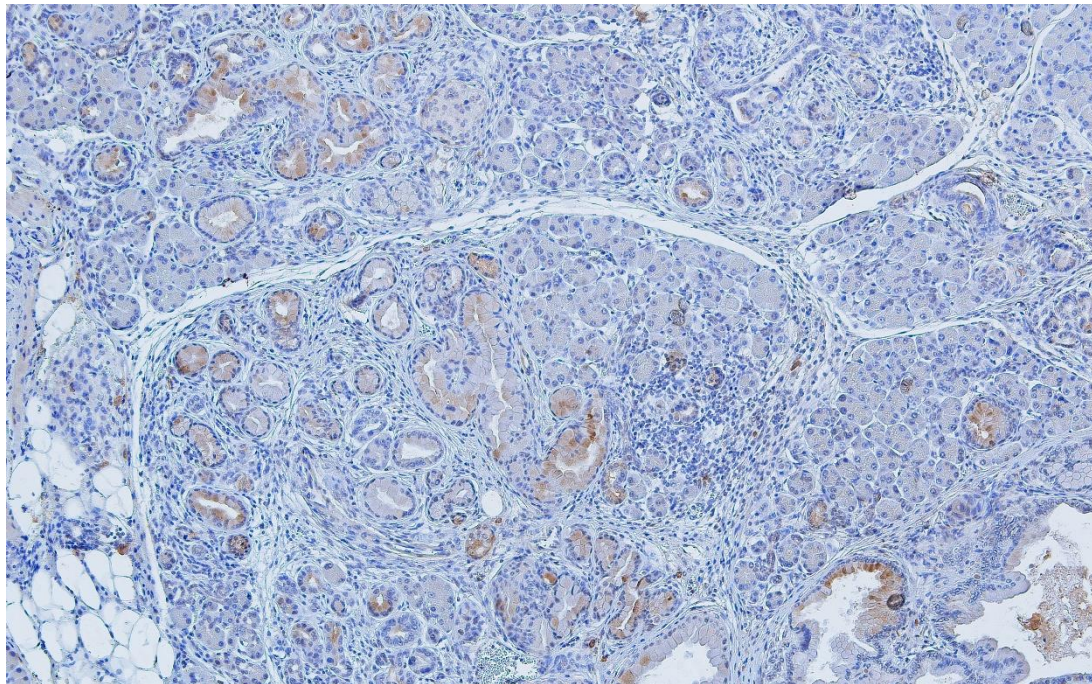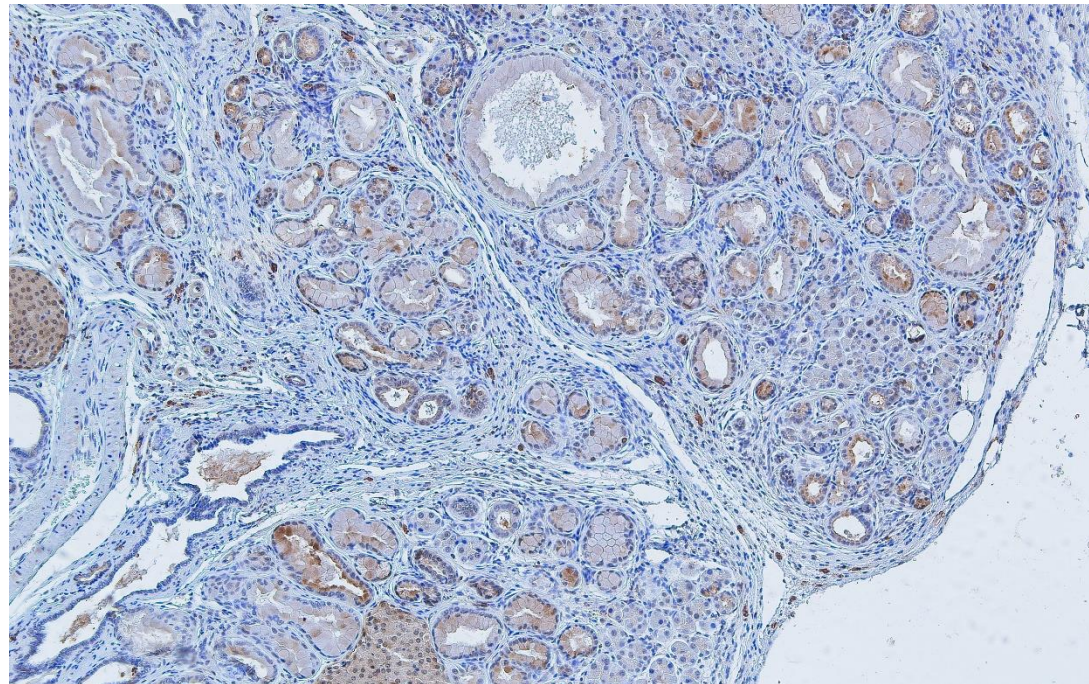

Additional represented photos for Figure 5

Additional represented photos for Figure 4G

Anti-TGFb1

MOUSE#3

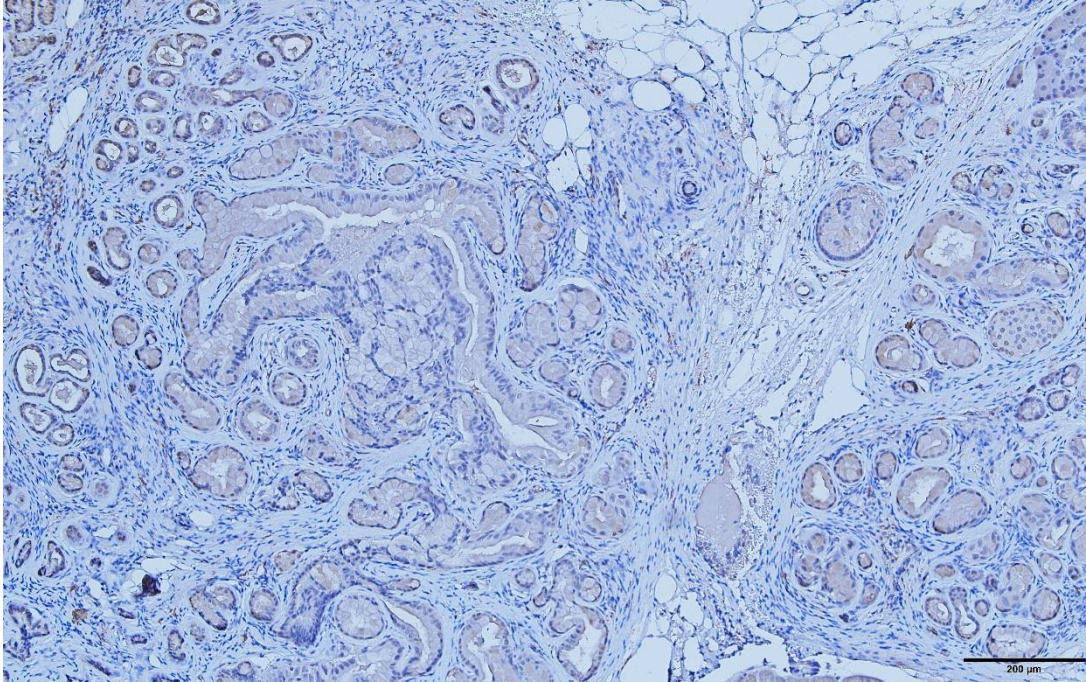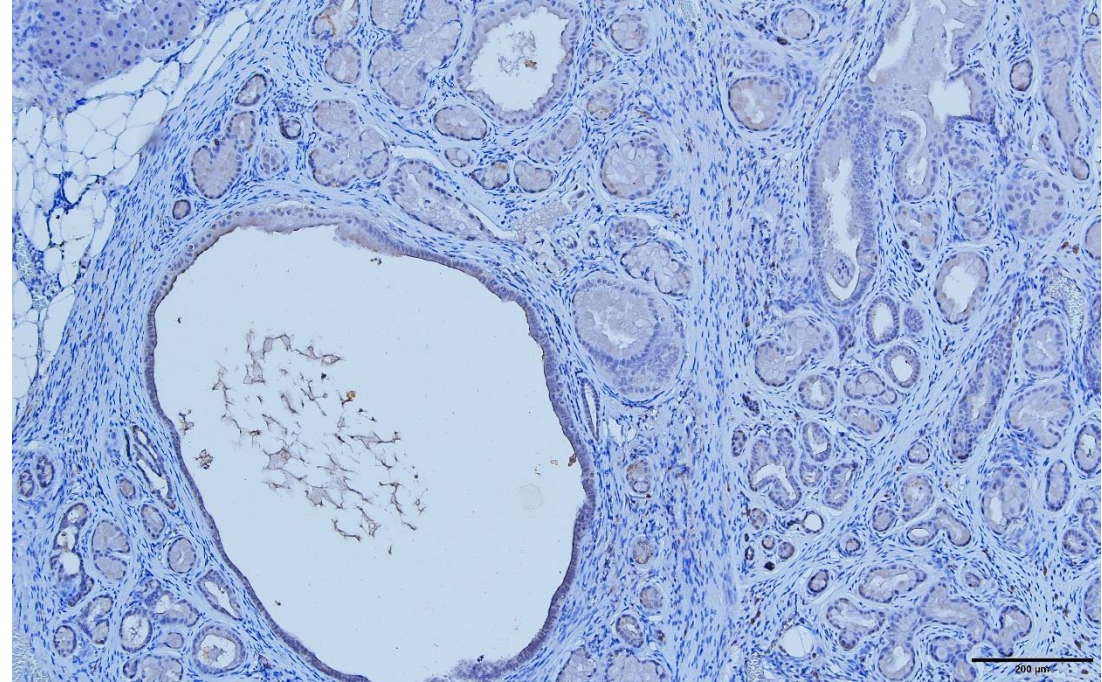

Additional represented photos for Figure 5  
Additional represented photos for Figure 4G

Anti-Ins1  
MOUSE#1

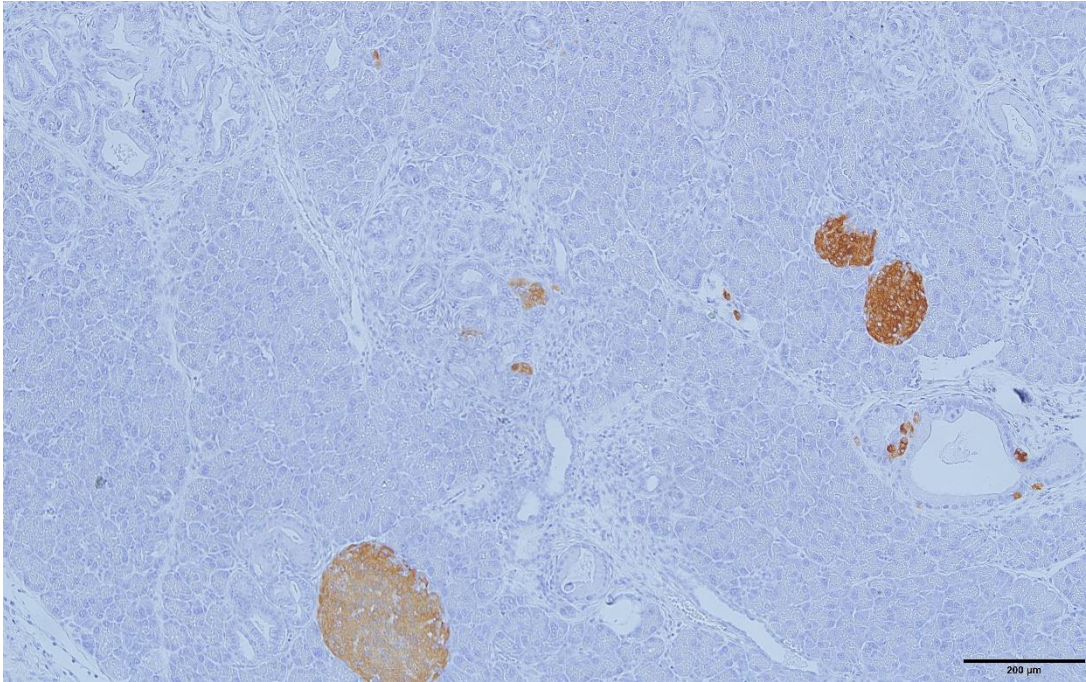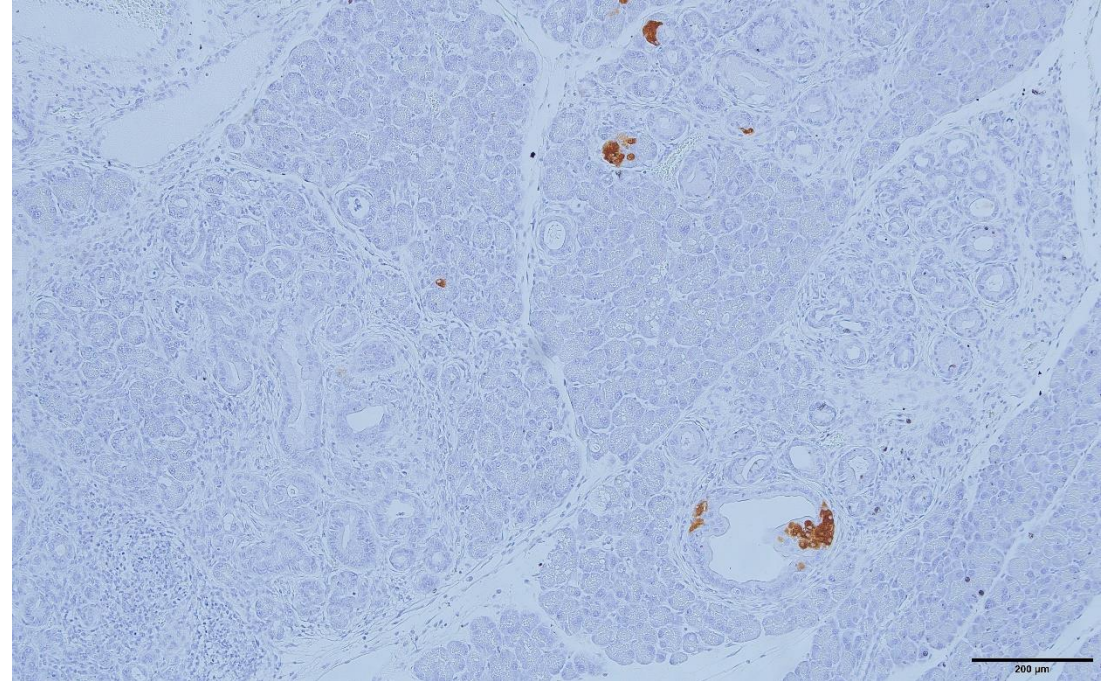

Additional represented photos for Figure 4B

Anti-Ins1  
MOUSE#2

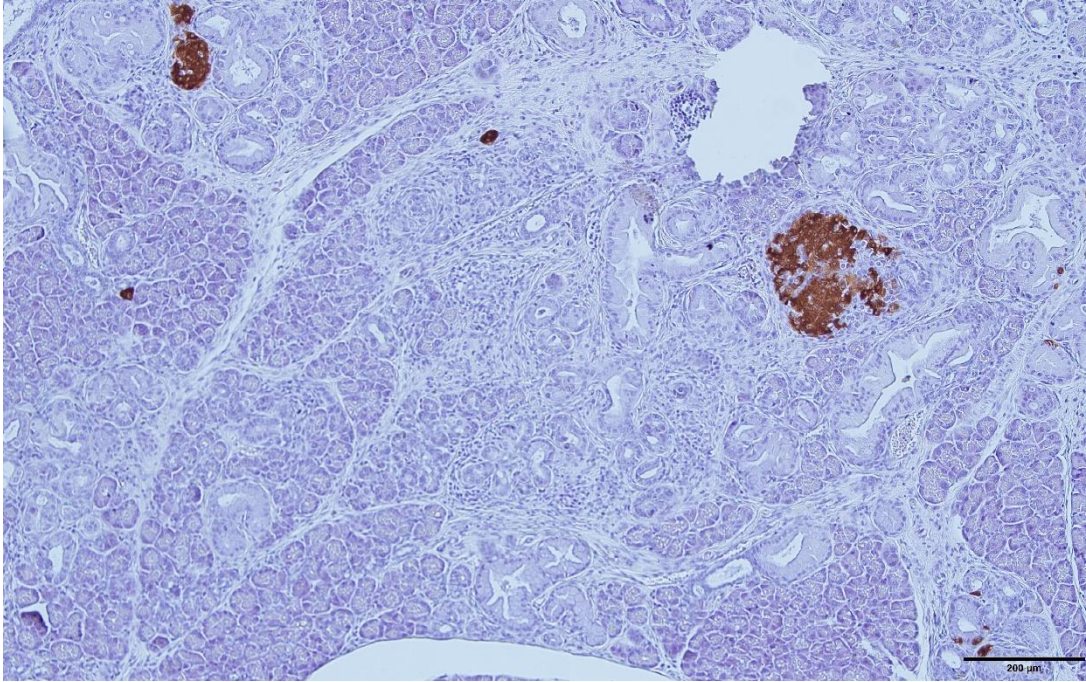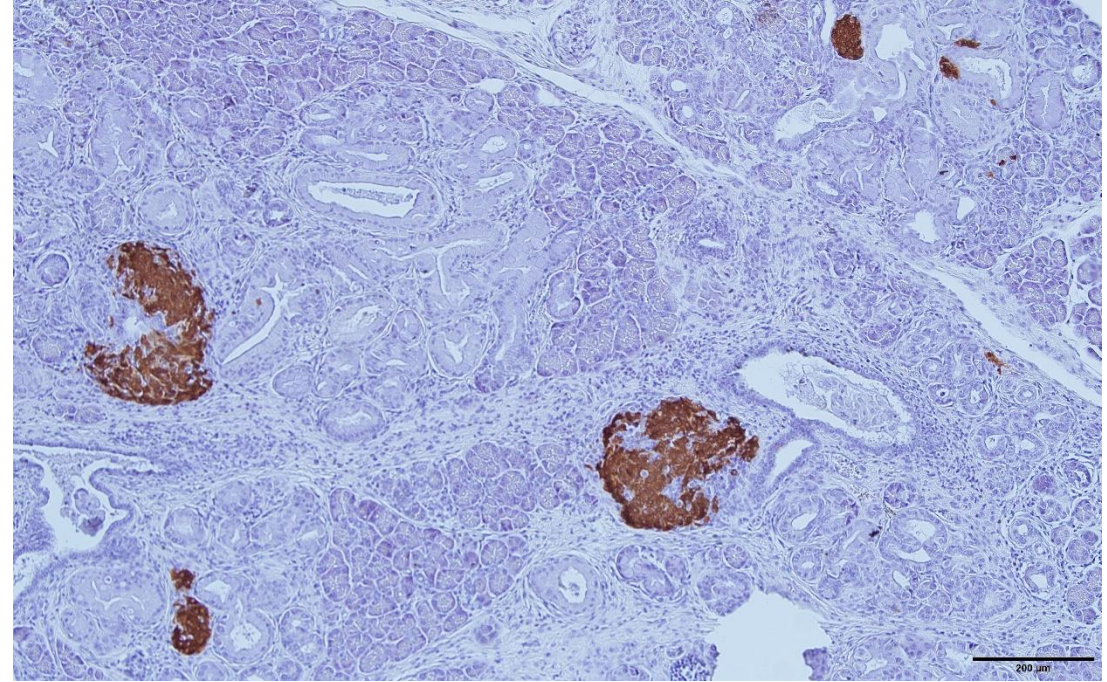

Additional represented photos for Figure 4B

Anti-Ins1  
MOUSE#3

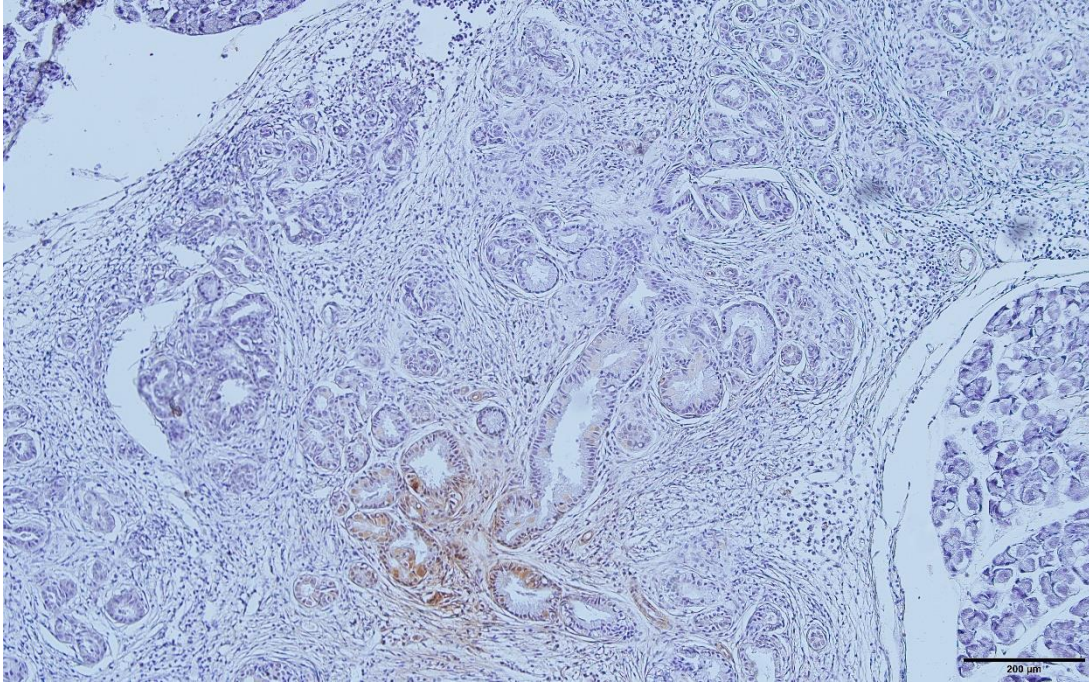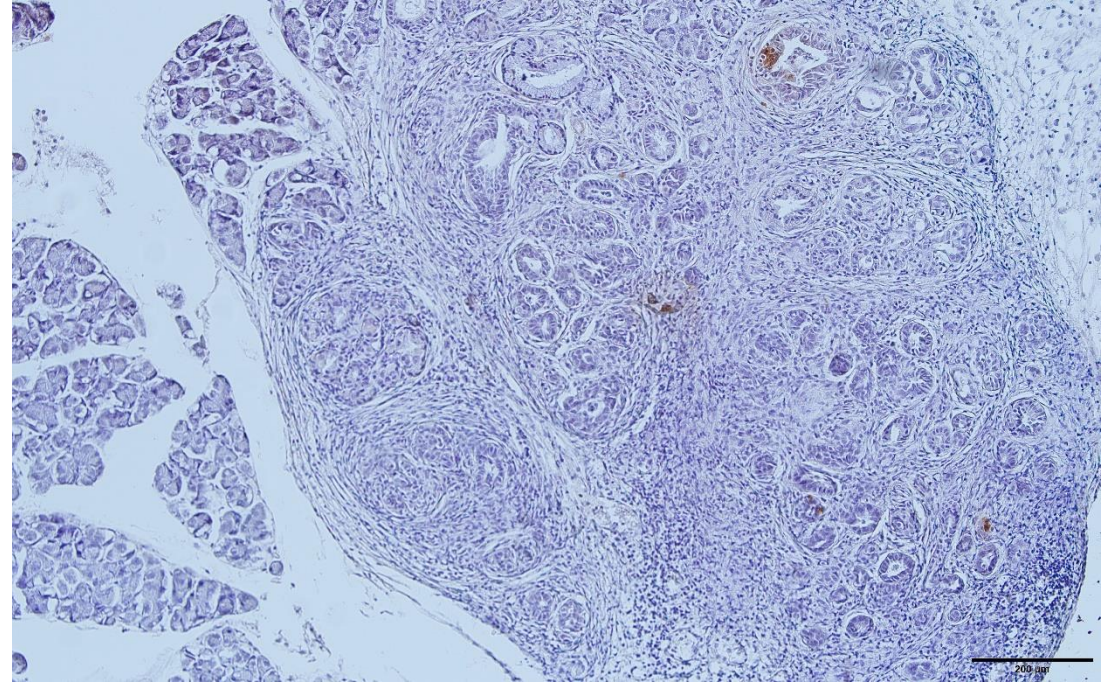

Additional represented photos for Figure 4B

# Supplementary Figure 1a

| Image Number | 1#  | 2# | 3#  | 4# | 5# | 6# | average | stdev |
|--------------|-----|----|-----|----|----|----|---------|-------|
| PT           | 0   | 0  | 0   | 0  | 0  | 0  | 0       | 0     |
| 17 days      | 0   | 0  | 0   | 0  | 0  | 2  | 0.3     | 0.8   |
| 1.5 months   | 0   | 0  | 0   | 0  | 1  | 12 | 2.1     | 4.8   |
| 3 months     | 43  | 30 | 54  | 61 | 35 | 21 | 40.6    | 15.0  |
| 5 months     | 47  | 58 | 66  | 57 | 58 | 44 | 55      | 8.0   |
| 9 months     | 93  | 83 | 66  | 59 | 84 | 98 | 80.5    | 15.1  |
| 15 months    | 103 | 89 | 123 | 96 | 91 | 84 | 97.6    | 13.9  |



# Batch Analysis Report

Run Date: 7/26/20 11:00 AM

Experiment: 06/11/2018 2

User ID: Administrator

Statistics Output: N/A

Worksheet PDF Output: E:\SORTER\2018 2-Batch\_Analysis\_26072020105943.pdf

## Specimen\_001

| Tube            | Status | Run Time         |
|-----------------|--------|------------------|
| spleen          | OK     | 7/26/20 11:00 AM |
| 6 month prt     | OK     | 7/26/20 11:00 AM |
| 6 month prt_001 | OK     | 7/26/20 11:00 AM |

BD FACSDiva 8.0.1

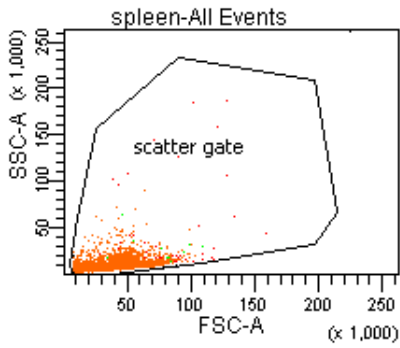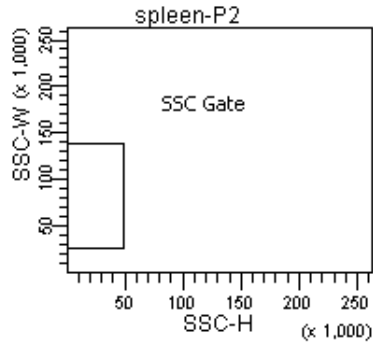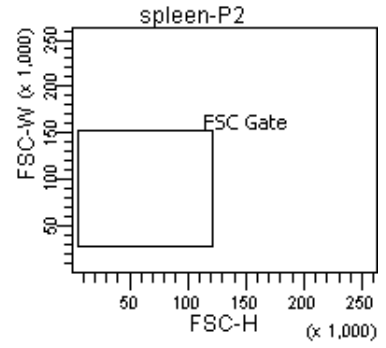

Tube: spleen

| Population   | #Events | %Parent | %Total |
|--------------|---------|---------|--------|
| All Events   | 10,000  | ####    | 100.0  |
| scatter gate | 9,768   | 97.7    | 97.7   |
| SSC Gate     | 9,641   | 98.7    | 96.4   |
| FSC Gate     | 9,613   | 99.7    | 96.1   |
| P1           | 9,613   | 100.0   | 96.1   |
| CD45+        | ####    | ####    | ####   |
| T+           | 0       | 0.0     | 0.0    |
| P2           | 0       | 0.0     | 0.0    |

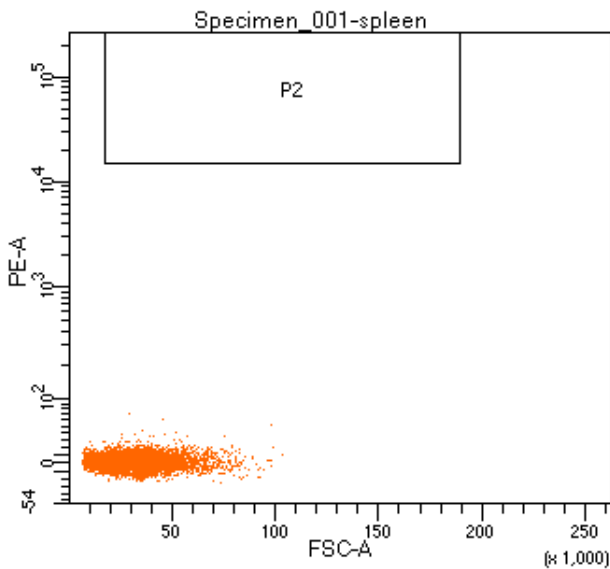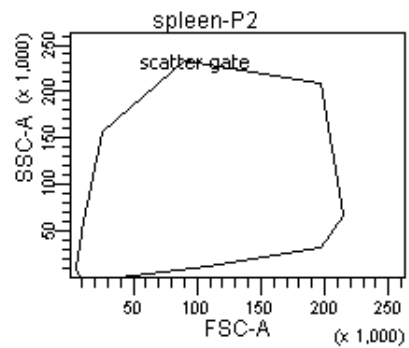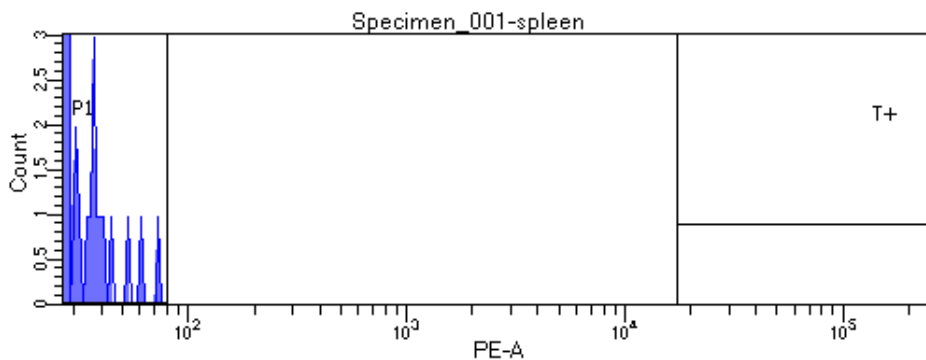

# BD FACSDiva 8.0.1

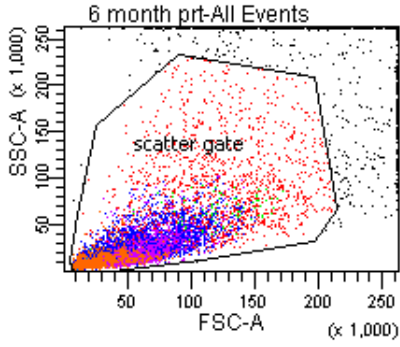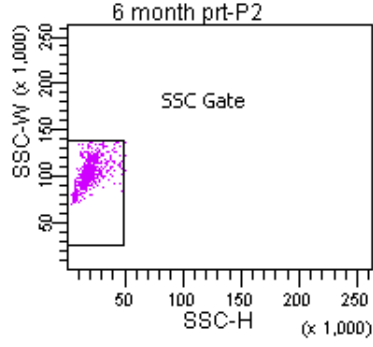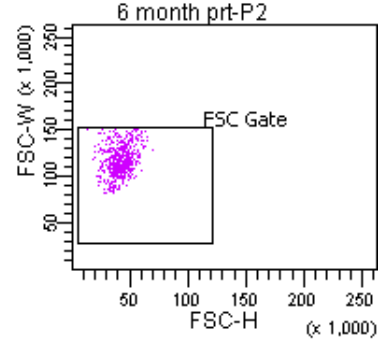

Tube: 6 month prt

| Population   | #Events | %Parent | %Total |
|--------------|---------|---------|--------|
| All Events   | 10,000  | ####    | 100.0  |
| scatter gate | 8,904   | 89.0    | 89.0   |
| SSC Gate     | 7,309   | 82.1    | 73.1   |
| FSC Gate     | 7,179   | 98.2    | 71.8   |
| P1           | 3,428   | 47.8    | 34.3   |
| CD45+        | ####    | ####    | ####   |
| T+           | 548     | 7.6     | 5.5    |
| P2           | 562     | 7.8     | 5.6    |

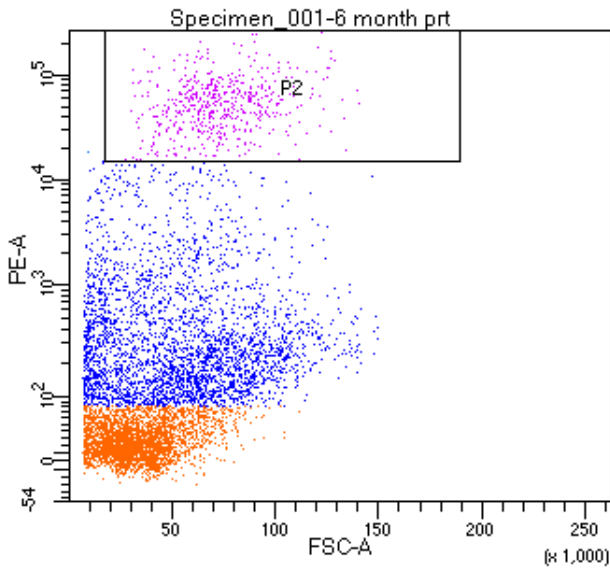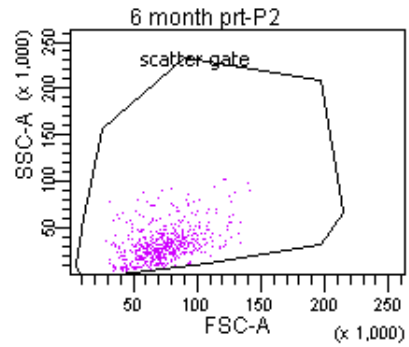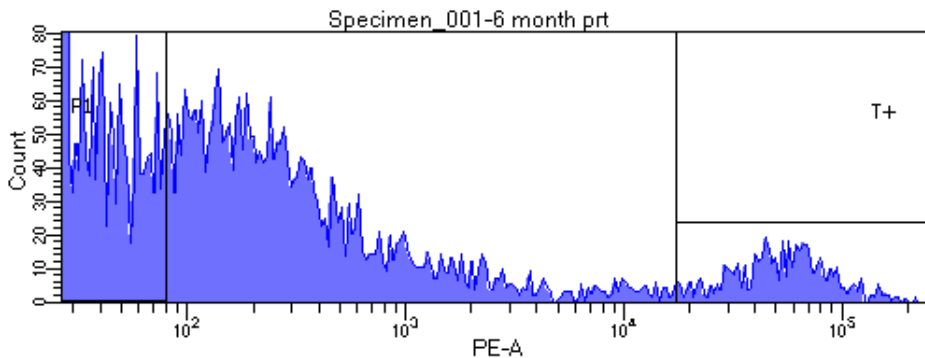

# BD FACSDiva 8.0.1

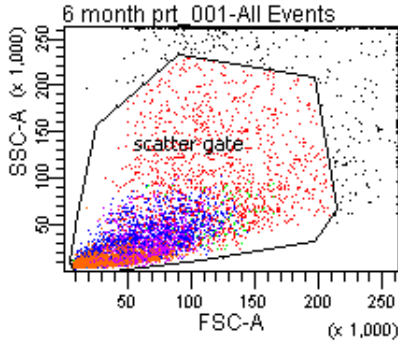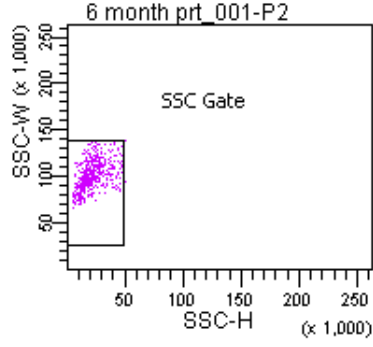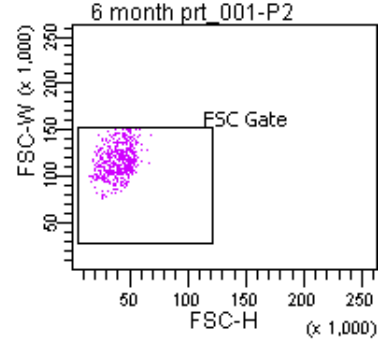

Tube: 6 month prt\_001

| Population   | #Events | %Parent | %Total |
|--------------|---------|---------|--------|
| All Events   | 7,020   | ####    | 100.0  |
| scatter gate | 6,132   | 87.4    | 87.4   |
| SSC Gate     | 4,790   | 78.1    | 68.2   |
| FSC Gate     | 4,693   | 98.0    | 66.9   |
| P1           | 2,048   | 43.6    | 29.2   |
| CD45+        | ####    | ####    | ####   |
| T+           | 510     | 10.9    | 7.3    |
| P2           | 522     | 11.1    | 7.4    |

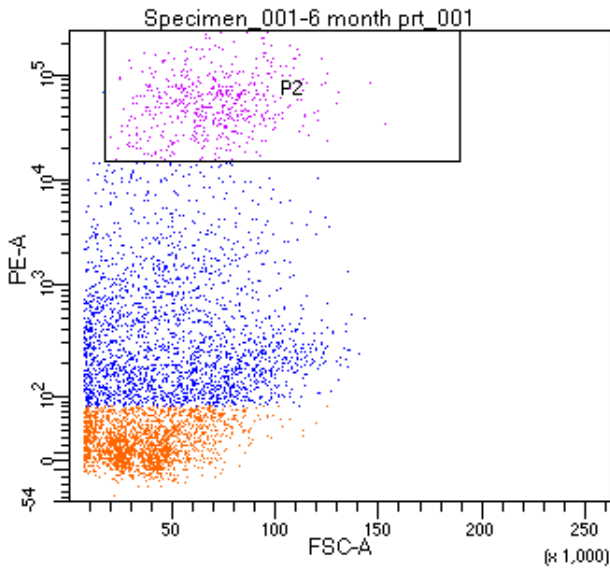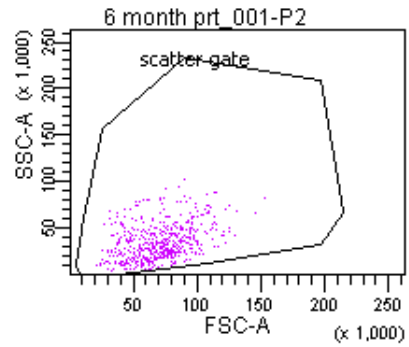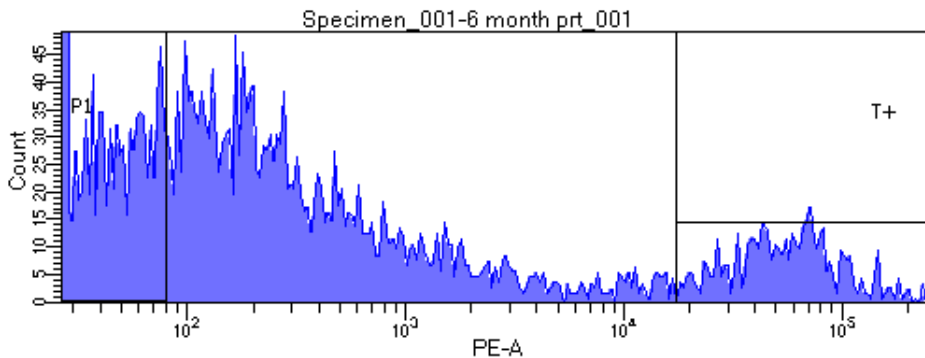

Supplement: 41467_2020_18207_MOESM15_ESM.pdf [file 41467_2020_18207_MOESM15_ESM.pdf]
